## Anti-chemokine antibodies after SARS-CoV-2 infection correlate with favorable disease course

Jonathan Muri<sup>1†</sup>, Valentina Cecchinato<sup>1†</sup>, Andrea Cavalli<sup>1,2\*</sup>, Akanksha A. Shanhag<sup>1</sup>, Milos Matkovic<sup>1</sup>, Maira Biggiogero<sup>3</sup>, Pier Andrea Maida<sup>3</sup>, Jacques Moritz<sup>1</sup>, Chiara Toscano<sup>1</sup>,  
5 Elaheh Ghovehoud<sup>1</sup>, Raffaello Furlan<sup>4,5</sup>, Franca Barbic<sup>4,5</sup>, Antonio Voza<sup>4,6</sup>, Guendalina De Nadai<sup>7</sup>, Carlo Cervia<sup>8</sup>, Yves Zurbuchen<sup>8</sup>, Patrick Taeschler<sup>8</sup>, Lilly A. Murray<sup>9</sup>, Gabriela Danelon-Sargenti<sup>1</sup>, Simone Moro<sup>1</sup>, Tao Gong<sup>1</sup>, Pietro Piffaretti<sup>1</sup>, Filippo Bianchini<sup>1</sup>, Virginia Crivelli<sup>1</sup>, Lucie Podešvová<sup>1</sup>, Mattia Pedotti<sup>1</sup>, David Jarrossay<sup>1</sup>, Jacopo Sgrignani<sup>1</sup>, Sylvia Thelen<sup>1</sup>, Mario Uhr<sup>10</sup>, Enos Bernasconi<sup>11,12</sup>, Andri Rauch<sup>13</sup>, Antonio Manzo<sup>14</sup>, Adrian  
10 Ciurea<sup>15</sup>, Marco B.L. Rocchi<sup>16</sup>, Luca Varani<sup>1</sup>, Bernhard Moser<sup>17</sup>, Barbara Bottazzi<sup>18</sup>, Marcus Thelen<sup>1</sup>, Brian A. Fallon<sup>19,20</sup>, Onur Boyman<sup>8,21</sup>, Alberto Mantovani<sup>4,18,22</sup>, Christian Garzoni<sup>23</sup>,  
Alessandra Franzetti-Pellanda<sup>3</sup>, Mariagrazia Ugucioni<sup>1,4†\*</sup>, Davide F. Robbiani<sup>1†\*</sup>

### 15 Affiliations:

<sup>1</sup>Institute for Research in Biomedicine, Università della Svizzera italiana; Bellinzona, Switzerland.

<sup>2</sup>Swiss Institute of Bioinformatics; Lausanne, Switzerland.

<sup>3</sup>Clinical Research Unit, Clinica Luganese Moncucco; Lugano, Switzerland.

20 <sup>4</sup>Department of Biomedical Sciences, Humanitas University, Via Rita Levi Montalcini 4, 20090 Pieve Emanuele, Milan, Italy.

<sup>5</sup>Internal Medicine, IRCCS Humanitas Research Hospital, Via Manzoni 56, 20089 Rozzano, Milan, Italy.

25 <sup>6</sup>Department of Emergency, IRCCS Humanitas Research Hospital, 20089 Rozzano, Milan, Italy.

<sup>7</sup>Emergency Medicine Residency School, Department of Biomedical Sciences, Humanitas University, Via Rita Levi Montalcini 4 - 20090 Pieve Emanuele, Milan, Italy.

<sup>8</sup>Department of Immunology, University Hospital Zurich, University of Zurich, Zurich, Switzerland.

30 <sup>9</sup>Lyme & Tick-Borne Diseases Research Center at Columbia University Irving Medical Center, New York, NY, USA.

<sup>10</sup>Synlab Suisse; Bioggio, Switzerland.

<sup>11</sup>Regional Hospital Lugano, Ente Ospedaliero Cantonale; Lugano, Switzerland.

<sup>12</sup>Università della Svizzera italiana; Lugano, Switzerland.

35 <sup>13</sup>Department of Infectious Diseases, Inselspital, Bern University Hospital, University of Bern; Bern, Switzerland.

<sup>14</sup>Rheumatology and Translational Immunology Research Laboratories (LaRIT), Division of Rheumatology, IRCCS Policlinico San Matteo Foundation, University of Pavia; Pavia, Italy.

40 <sup>15</sup>Department of Rheumatology, Zurich University Hospital, University of Zurich; Zurich, Switzerland.

<sup>16</sup>Department of Biomolecular Sciences, Biostatistics Unit, University of Urbino; Urbino, Italy.

45 <sup>17</sup>Division of Infection & Immunity, Henry Wellcome Building, Cardiff University School of Medicine; Cardiff, United Kingdom.

<sup>18</sup>IRCCS Humanitas Research Hospital, Via Manzoni 56, 20089 Rozzano, Milan, Italy.

<sup>19</sup>Lyme & Tick-Borne Diseases Research Center at Columbia University Irving Medical Center, New York, NY, USA.

50 <sup>20</sup>Lyme Research Program at the New York State Psychiatric Institute, New York, NY, USA.

<sup>21</sup>Faculty of Medicine and Faculty of Science, University of Zurich, Zurich, Switzerland.

<sup>22</sup>The William Harvey Research Institute, Queen Mary University of London, Charterhouse Square, London, UK.

55 <sup>23</sup>Internal Medicine and Infectious Diseases, Clinica Luganese Moncucco; Lugano, Switzerland.

\*Corresponding author. Email: [drobbiani@irb.usi.ch](mailto:drobbiani@irb.usi.ch) (DFR); [mariagrazia.uguccioni@irb.usi.ch](mailto:mariagrazia.uguccioni@irb.usi.ch) (MUg); [andrea.cavalli@irb.usi.ch](mailto:andrea.cavalli@irb.usi.ch) (ACa)

†These authors contributed equally to this work

60 ‡These authors contributed equally to this work

## **Abstract:**

Infection by SARS-CoV-2 leads to diverse symptoms, which can persist for months. While  
65 antiviral antibodies are protective, those targeting interferons and other immune factors are  
associated with adverse COVID-19 outcomes. Instead, we discovered that antibodies against  
specific chemokines are omnipresent after COVID-19, associated with favorable disease, and  
predictive of lack of long COVID symptoms at one year post infection. Anti-chemokine  
antibodies are present also in HIV-1 infection and autoimmune disorders, but they target  
70 different chemokines than those in COVID-19. Monoclonal antibodies derived from COVID-  
19 convalescents that bind to the chemokine N-loop impair cell migration. Given the role of  
chemokines in orchestrating immune cell trafficking, naturally arising anti-chemokine  
antibodies associated with favorable COVID-19 may be beneficial by modulating the  
inflammatory response and thus bear therapeutic potential.

75

## **One-Sentence Summary:**

Naturally arising anti-chemokine antibodies associate with favorable COVID-19 and predict  
lack of long COVID.

80 The spectrum of disease manifestations upon infection with severe acute respiratory syndrome  
coronavirus 2 (SARS-CoV-2) is broad <sup>1</sup>. Factors that predispose people to hospitalization and  
death include age, gender, ethnicity, obesity, genetic predisposition, autoantibodies against  
interferon, and comorbidities such as hypertension, diabetes, and coronary heart disease <sup>2, 3, 4,</sup>  
5, 6. Coronavirus disease 2019 (COVID-19) convalescent individuals often lament protracted  
85 symptoms over months, a condition referred to as long COVID or PASC (Post-Acute Sequelae  
of COVID), and are at increased risk of cardiovascular events <sup>7, 8, 9, 10, 11, 12, 13</sup>. Some evidence  
points to a role for immune dysregulation and autoimmunity as contributors to long COVID,  
although virus persistence has also been proposed <sup>14, 15, 16</sup>. Overall, there is however little  
understanding of the biology underlying long COVID and of the reasons for the differences in  
90 COVID-19 manifestation.

Chemokines are chemotactic cytokines that mediate leukocyte trafficking and activity  
by binding to seven-transmembrane G protein-coupled receptors <sup>17, 18</sup>. They play a fundamental  
role in health and disease since the proper trafficking of leukocyte subsets is governed by the  
combinatorial diversity of their responsiveness to chemokines <sup>18</sup>. In addition to  
95 elevated levels of pro-inflammatory cytokines (*e.g.* IL-6, TNF, and IL1 $\beta$ ), higher levels of  
certain chemokines are observed in acute COVID-19 (*e.g.* CCL2, CCL3, CCL4, CCL7, CCL8,  
CCL19, CXCL2, CXCL5, CXCL8, CXCL9, CXCL10, CXCL13, CXCL16 and CXCL17) and  
multiomic studies recently identified plasma chemokines among the most significant factors  
associated with COVID-19 severity <sup>19, 20, 21, 22, 23, 24, 25, 26</sup>. Accordingly, chemokines recruit  
100 neutrophils and monocytes to sites of infection, where they play a key role in the  
pathophysiology of COVID-19 by sustaining inflammation and causing collateral tissue  
damage and fibrosis, particularly during the inflammatory phase that follows virus clearance  
<sup>20, 24, 27, 28, 29, 30</sup>. Chemokines have also been implicated in the pathogenesis and as biomarkers  
of long COVID <sup>31</sup>. Anti-inflammatory treatments, such as steroids and IL-6 blockade, are  
105 efficacious in hospitalized COVID-19 patients, and therapies targeting the chemokine system  
are under development for immunological disorders and have been proposed for COVID-19 <sup>18,</sup>  
<sup>22, 32, 33</sup>.

Similar to earlier work linking anti-cytokine antibodies to mycobacterial,  
staphylococcal and fungal diseases <sup>34, 35, 36</sup>, autoantibodies against cytokines have been  
110 described in COVID-19. In particular, anti-type I Interferon antibodies distinguished ~10% of  
life-threatening pneumonia and ~20% of deaths from COVID-19 <sup>6, 37, 38</sup>. Moreover,  
autoantibodies characteristic of systemic autoimmune disorders, such as anti-phospholipid  
antibodies, anti-nuclear antibodies and rheumatoid factor, were reported in COVID-19 <sup>39, 40, 41,</sup>

115 <sup>42, 43</sup>. A recent high-throughput screening by yeast display of the secretome further revealed the presence of autoantibodies against several immune factors, including chemokines <sup>44</sup>. However, anti-chemokine antibodies were infrequent by this method, and there was neither correlation with disease severity, or long COVID, nor information about the persistence of such autoantibodies over time.

120 We devised a peptide-based strategy to measure and discover antibodies that bind to a functional region of each of the 43 human chemokines. By examining three diverse independent cohorts, comprising subjects who contracted COVID-19 during 2020 and early 2021, we found that the presence of antibodies against specific chemokines helps to identify convalescent individuals with favorable acute and long COVID disease course. Anti-chemokine monoclonal antibodies derived from these individuals block leukocyte migration  
125 and thus may be beneficial through modulation of the inflammatory response.

## RESULTS

### 130 ***COVID-19 and anti-chemokine antibodies***

To evaluate anti-chemokine antibodies after COVID-19, we obtained plasma samples from a convalescent cohort on average at 6 months after disease onset (Lugano cohort; Extended Data Fig. 1a; Supplementary Table 1). Since the N-terminal loop (N-loop) of chemokines is required for receptor binding, we reasoned that biologically active anti-chemokine antibodies would likely target this region, whose sequence happens to be specific for each but two of the 43 human chemokines (Extended Data Fig. 1b)<sup>45</sup>. Therefore, we designed peptides corresponding to the N-loop of each chemokine for use in enzyme-linked immunosorbent assays (ELISA, Supplementary Table 2). IgG antibody levels were measured on serial plasma dilutions and the signal plotted as heatmap (Fig. 1a; Extended Data Fig. 1c; Supplementary Table 3). Analysis of all parameters by nonlinear dimensionality reduction with *t*-distributed stochastic neighbor embedding (t-SNE) revealed a clear separation between controls and COVID-19 convalescents (Extended Data Fig. 2a). Some convalescent plasma revealed high levels of IgGs to certain chemokines (for example CCL8, CXCL13 and CXCL16). For these chemokines, antibody levels to the N-loop significantly correlated with those against the C-terminal region of the same chemokine, suggesting that, when present, antibodies formed against multiple chemokine epitopes (Fig. 1a; Extended Data Fig. 2b). When considering antibodies against each chemokine individually, a significant difference in reactivity over uninfected controls was observed for peptides corresponding to 23 of the 43 chemokines (Extended Data Fig. 2c). Antibodies to the three chemokines with  $p < 10^{-4}$  (CCL19, CCL22 and CXCL17; “COVID-19 signature”) clustered together, and by themselves were sufficient to correctly assign uninfected controls and COVID-19 convalescents with high accuracy (96.8%; Fig. 1a-c; Extended Data Fig. 2c,d; see Methods). The findings were validated with two independent cohorts: one that was sampled during the acute phase and on average at 7 months from disease onset (Milan cohort,  $n=44$ ; 90.5% and 89.5% accuracy, respectively; Extended Data Fig. 3a,b; Supplementary Tables 1 and 3), and a second cohort that was evaluated at 13 months (Zurich cohort,  $n=104$ ; 92.9% accuracy; Extended Data Fig. 3a,b; Supplementary Tables 1 and 3). Thus, COVID-19 is associated with a specific pattern of anti-chemokine antibodies.

To examine the relationship between anti-chemokine antibodies and other serologic features of the COVID-19 cohort, we used ELISA and a pseudovirus-based neutralization assay to measure binding and neutralizing capacity of antibodies against SARS-CoV-2 (Fig. 1a)<sup>46</sup>.

In agreement with previous studies, IgG binding to SARS-CoV-2 Spike receptor binding domain (RBD) and plasma half-maximal SARS-CoV-2 neutralizing titers (NT<sub>50</sub>) were variable but positively correlated with each other and with age (Extended Data Fig. 4a-c)<sup>46</sup>. In contrast, there was no correlation between NT<sub>50</sub> or anti-RBD IgGs and the levels of antibodies to the signature chemokines CCL19, CCL22 and CXCL17, or to the sum of all anti-chemokine IgG reactivities (cumulative area under the curve; Extended Data Fig. 4d). A weak negative correlation between age and the sum of all anti-chemokine IgG reactivities was observed (Extended Data Fig. 4d), but there were no differences in the levels of antibodies to the signature chemokines between males and females (Extended Data Fig. 4e). We conclude that, after COVID-19, antibodies against specific chemokines are not correlated with those against SARS-CoV-2.

### ***Anti-chemokine antibodies over time***

To document the temporal evolution of anti-chemokine antibodies following COVID-19, we compared side-by-side the reactivities of plasma collected from the Lugano cohort at approximately 6 and 12 months from symptom onset (Extended Data Fig. 5a; Supplementary Tables 1 and 3). In agreement with earlier findings<sup>47, 48</sup>, antibodies to the virus RBD significantly decreased in unvaccinated COVID-19 convalescents, while they increased in those receiving at least one dose of mRNA-based COVID-19 vaccine (Extended Data Fig. 5b; Supplementary Table 1). Conversely, and regardless of vaccination status, antibodies to the COVID-19 signature chemokine CCL19 significantly increased (2.1-fold,  $p < 0.0001$ ), those to CXCL17 remained generally stable, and those to CCL22 followed variable kinetics (Fig. 1d and data not shown). Similar to those against CCL19, antibody levels to CCL8, CCL13, CCL16, CXCL7 and CX3CL1 were also augmented at 12 months (Extended Data Fig. 5c). To further investigate the kinetics of COVID-19 signature antibodies, we analyzed cohort individuals for which acute samples were also available ( $n=12$ ; Extended Data Fig. 5d; Supplementary Tables 1 and 3). During acute COVID-19, IgG antibodies to CCL19, but not to CCL22 or CXCL17, were already higher than in uninfected controls, and continued to increase until 12 months (Extended Data Fig. 5e). Similarly, in the Milan cohort, autoantibodies against these three chemokines were already higher than in controls during the acute phase (Extended Data Fig. 3b; Supplementary Table 3). In contrast to natural infection, no significant change in antibody reactivity to any of the chemokines was observed upon COVID-19 mRNA vaccination of SARS-CoV-2 naïve individuals after about 4 months (130 days on average;

n=16; Extended Data Fig. 5f; Supplementary Tables 1 and 3). Therefore, unlike the antibodies  
195 to SARS-CoV-2 RBD, which decrease over time, the levels of some anti-chemokine antibodies  
that are present upon COVID-19 increase over one year of observation.

### ***Anti-chemokine antibodies and severity of disease***

Autoantibodies have been detected in a portion of hospitalized COVID-19 patients, linking  
200 their presence to severe illness <sup>6, 39, 43, 44</sup>. To evaluate the relationship between the severity of  
acute COVID-19 and convalescent anti-chemokine IgGs, we compared individuals in the  
original Lugano cohort who were either hospitalized because of the infection (n=50) or  
remained as outpatients (n=21; Fig. 1e). No significant difference in age distribution  
was observed between groups (age [years]: mean±SD; 60±14 in hospitalized, 57±15 in  
205 outpatients; p=0.3487), while a higher proportion of males was observed among hospitalized  
but not outpatients (60% and 38.1%, respectively; Supplementary Table 1) <sup>5</sup>.

When the most significant differences in autoantibody levels were considered (p<10<sup>-4</sup>),  
only the antibodies against CCL19 were higher in hospitalized individuals over uninfected  
controls, while antibodies against 8 chemokines (CXCL8, CCL22, CXCL16, CCL27, CXCL7,  
210 CCL20, CX3CL1, in addition to CCL19) were increased in outpatients (Fig. 1e; Extended Data  
Fig. 6a). Consistent with this finding, the outpatient but not the hospitalized individuals  
displayed significantly higher cumulative anti-chemokine reactivity (p=0.0038; Fig. 1f). Thus,  
a broader pattern and higher overall amounts of anti-chemokine antibodies are observed at  
6 months in those COVID-19 convalescents, who were outpatients during the acute phase of  
215 the disease.

Direct comparison of previously hospitalized and outpatient individuals by t-SNE  
analysis of all anti-chemokine datasets separated the two groups (Fig. 1g). Antibodies against  
three chemokines highly significantly distinguished outpatients from hospitalized subjects  
(p<10<sup>-4</sup>): antibodies against CXCL5, CXCL8 and CCL25 were all lower in individuals with  
220 severe illness requiring hospitalization, and this was not linked to the therapy received during  
hospitalization (Extended Data Fig. 6a,b; Supplementary Table 1). The combination of  
antibody values against these three chemokines alone could correctly assign formerly  
hospitalized and outpatient individuals with an accuracy of 77.5% (“COVID-19 hospitalization  
signature”; Fig. 1h). Similar findings were obtained with the Milan (85.0% and 84.1% accuracy  
225 at acute and 7 months, respectively; Extended Data Fig. 3c) and Zurich cohorts (73.1%  
accuracy at 13 months; Extended Data Fig. 3c). Among the COVID-19 hospitalization



signature antibodies, those to CXCL5 and CXCL8 were negatively correlated with anti-RBD IgG and age, while no differences were observed between males and females (Extended Data Fig. 6c,d). Consistent with previous work, both anti-RBD IgG and NT<sub>50</sub> values were significantly higher in hospitalized individuals compared to outpatients and in males compared to females of both groups (Extended Data Fig. 6e)<sup>46</sup>. Thus, the anti-chemokine antibody signature that distinguishes uninfected from COVID-19 convalescents (CCL19, CCL22 and CXCL17; Fig. 1b,c) is different from the signature associated with different severity of COVID-19 disease (CXCL5, CXCL8 and CCL25; Fig. 1h).

235

### ***Anti-chemokine antibodies and long COVID***

A fraction of individuals who recover from COVID-19 experience long-term sequelae<sup>7, 8, 9, 10</sup>. To determine whether a specific pattern of anti-chemokine antibodies at 6 months is predictive of the persistence of symptoms, we collected information on long COVID from the Lugano cohort at 12 months (Fig. 2). 65.1% of all participants reported persistence of at least one symptom related to COVID-19. Among these, the average number of long-term symptoms was 3.3, and they were more frequent among formerly hospitalized individuals than outpatients (72.7% versus 47.4%; Fig. 2a; Extended Data Fig. 7a,b; Supplementary Table 1). No differences in age, gender distribution or time from disease onset to second visit were observed between individuals with and without protracted symptoms (Extended Data Fig. 7c).

Convalescents with long-term sequelae showed significantly lower cumulative levels of anti-chemokine antibodies compared to those without symptoms ( $p=0.0135$ ; Fig. 2b). This was particularly true for outpatients and among females (Extended Data Fig. 7d,e). In contrast, anti-RBD IgG and NT<sub>50</sub> values were comparable between the two groups (Fig. 2b). The total levels of anti-chemokine antibodies did not correlate with the number of symptoms (Extended Data Fig. 7f). These data indicate that overall higher levels of anti-chemokine antibodies at 6 months after COVID-19 are associated with absence of long-term symptoms at 12 months.

IgG antibodies against three chemokines distinguished the groups with high significance: CCL21 ( $p=0.0001$ ), CXCL13 ( $p=0.0010$ ) and CXCL16 ( $p=0.0011$ ; Fig. 2c; Extended Data Fig. 7g; “Long COVID signature”). Logistic regression analysis using the antibody values for these 3 chemokines alone predicted the absence of persistent symptoms with 77.8% accuracy (Fig. 2d). Similarly, analysis of the Zurich cohort at 13 months showed 72.1% accuracy of association with lack of long COVID, even though in that cohort only anti-

260 CCL21 antibodies were significantly different between groups (Extended Data Fig. 3d). These results indicate that specific patterns of anti-chemokine antibodies at 6 months are associated with the longer-term persistence of symptoms after COVID-19.

Since anti-chemokine antibodies to CXCL13 and CXCL16 are associated with decreased likelihood of long COVID, we next derived corresponding memory B cell antibodies  
265 from available PBMC samples (Supplementary Table 4; see Methods). Three N-loop binding monoclonal antibodies were obtained for CXCL16, which blocked migration of a cell line expressing the cognate receptor (CXCR6; Fig. 2e,f; Extended Data Fig. 8a,b; Supplementary Tables 4 and 5). Similarly, 3 anti-CXCL13 N-loop antibodies bound in ELISA and inhibited chemotaxis of primary CD19<sup>+</sup> human B cells (Fig. 2g,h; Extended Data Fig. 8c; Supplementary  
270 Tables 4 and 5). By the same approach, we discovered chemotaxis-blocking antibodies specific for CCL8 and CCL20 (Extended Data Fig. 8d-j and Supplementary Tables 4 and 5). Consistent with these results, polyclonal plasma IgG from COVID-19 convalescents effectively blocked chemotaxis at concentrations 50 times lower than those found in human serum<sup>49</sup> (Extended Data Fig. 8k). Therefore, confirming our initial hypothesis, antibodies from COVID-19  
275 convalescents that bind to the N-loop of chemokines are biologically active.

### ***Lack of correlation between chemokines and their antibodies***

To test the correlation between autoantibody and corresponding antigen, we first measured plasma chemokine levels. In agreement with earlier reports<sup>19, 20, 21, 22, 23, 24, 25</sup>, the levels of  
280 CCL2, CCL3, CCL4, CCL19, CCL21, CCL22, CCL25, CXCL2, CXCL8, CXCL9, CXCL10, CXCL13 and CXCL16 were significantly elevated during acute disease, and 8 of these chemokines remained above control levels at 7 months post infection (CCL19, CCL21, CCL22, CXCL2, CXCL8, CXCL10, CXCL13 and CXCL16; Milan cohort; Fig. 3a and Supplementary Table 6). Similar results were observed with the 12 individuals from the Lugano cohort for  
285 which acute samples were available (Fig. 3a). Of note, none of the chemokines corresponding to autoantibodies of the hospitalization signature (CXCL5, CXCL8 and CCL25) were significantly different between mild and severe patients (Milan cohort; Fig. 3b).

We next compared the levels of chemokine and corresponding autoantibody. Consistent with the lack of significant differences in chemokine levels between groups, no correlation was  
290 observed between the levels of chemokines and those of the related signature autoantibodies in the acute phase or at 7 months post infection (Milan cohort; Fig. 3c; Supplementary Table 6). Furthermore, no increase of anti-CCL3 and anti-CCL4 antibodies was detected, although the

amount of corresponding chemokines was elevated in plasma (Lugano cohort; Fig. 3b and Extended Data Fig. 6a). We conclude that, even though chemokines rapidly increase and persist for at least 6 months in plasma, their level does not correlate with the amount of corresponding anti-chemokine antibodies in the circulation.

### ***Anti-chemokine antibodies in other infectious and autoimmune diseases***

To examine the relevance of anti-chemokine antibodies beyond COVID-19, we measured their presence in plasma from patients chronically infected with HIV-1 (n=24), and from individuals affected by Ankylosing Spondylitis (AS, n=13), Rheumatoid Arthritis (RA, n=13) and Sjögren Syndrome (SjS, n=13; Fig. 4; Supplementary Tables 1 and 3; see Methods). While antibodies against a single chemokine distinguished COVID-19 from uninfected controls with high confidence (CCL19,  $p < 10^{-4}$ ), in HIV-1, antibodies against 14 chemokines (that did not include CCL19) were significantly increased: CCL2, CCL3, CCL4, CCL5, CCL20, CCL21, CCL22, CCL23, CCL27, CCL28, CXCL7, CXCL8, CXCL9 and CXCL12 ( $p < 10^{-4}$  for all; Fig. 4a,b; Extended Data Fig. 9a; Supplementary Table 3). Similarly, AS, RA and SjS shared autoantibodies against 4 chemokines: CCL4, CCL19, CCL25 and CXCL9 ( $p < 10^{-4}$  for all; Fig. 4a,b; Extended Data Fig. 9a and Extended Data Fig. 10a). In contrast, samples from *Borrelia* infected individuals (Lyme disease cohort; n=27) were indistinguishable from control except for elevated anti-CXCL14 antibodies in the acute phase (Extended Data Fig. 9b, Supplementary Tables 1 and 3). Unsupervised clustering analysis with all anti-chemokine antibody values correctly categorized all COVID-19 and HIV-1 samples with 100% accuracy, while the autoimmune diseases all clustered with each other (Extended Data Fig. 10b; see Methods). A similar result was obtained by t-SNE analysis (Fig. 4c). Thus, patterns of anti-chemokine antibodies not only distinguish different COVID-19 trajectories, but also characterize other infections and autoimmune disorders.

## DISCUSSION

320 We discovered that autoantibodies against chemokines are omnipresent after SARS-CoV-2 infection, and that higher levels of specific anti-chemokine antibodies are associated with favorable disease outcomes. Our findings, validated by two additional cohorts, contrast previous reports that connected autoantibodies to severe COVID-19 illness. For example, autoantibodies against type I interferon were detected in 10-20% of individuals with  
325 COVID-19 pneumonia or dying from COVID-19<sup>6, 37</sup>, and autoantibodies against a panel of immune molecules (including chemokines) and other self-antigens were described to occur sporadically and more frequently in critical COVID-19<sup>39, 40, 44, 50</sup>. These observations are in line with earlier work linking the presence of autoantibodies to adverse outcome in other infections<sup>34, 35, 36, 51, 52</sup>.

330 Chemokines drive the activation and recruitment of leukocytes to sites of infection and are involved in tissue repair<sup>17, 18</sup>. Accordingly, in COVID-19, several chemokines are detected in high amounts in bronchoalveolar and other fluids, fueling a pro-inflammatory environment in the lungs, which likely contributes to COVID-19 critical illness and hospitalization<sup>19, 20, 21, 22, 23</sup>. We find the levels of autoantibodies against CXCL5, CXCL8 and CCL25 to be  
335 augmented in COVID-19 patients with milder disease over those that require hospitalization already during the acute phase. Interestingly, the plasma levels of all three corresponding chemokines were also increased during acute disease, but they could not distinguish the two groups and there was no correlation between levels of chemokine and corresponding autoantibody. Since these chemokines attract neutrophils and other cell types that promote  
340 inflammation and tissue remodeling, the presence of the corresponding autoantibodies suggests protection through dampening of the damaging inflammatory response associated with severe COVID-19. A disease-modifying role of the chemokine system in acute COVID-19 is further supported by transcriptomic analyses and by genetic studies identifying regions of chromosome 3 encoding for chemokine receptors to be linked to critical illness<sup>3, 53, 54</sup>.

345 Like those associated with milder disease, autoantibodies to three other chemokines (CCL21, CXCL13 and CXCL16) are increased in individuals without long COVID one year after the infection. These chemokines are important for tissue trafficking and activation of T and B lymphocytes. Therefore, it is conceivable that the corresponding autoantibodies positively impact the long-term outcome of COVID-19 by antagonizing or otherwise  
350 modulating the activation, recruitment and retention of these cell types<sup>55</sup>. In keeping with this

observation, persistent immune responses have been proposed as a mechanism for long COVID, and chemokines have been implicated in its pathogenesis <sup>7,31</sup>.

Regardless of disease trajectory, the presence of three other anti-chemokine antibodies is generally associated with COVID-19 infection: CCL19, CCL22 and CXCL17. Interestingly, 355 IgG autoantibodies to these three chemokines are detected early on during the acute phase, suggesting that they are either pre-existing or rapidly induced following the infection. The early detection of anti-chemokine antibodies and their persistence or even increase between 6 and 12 months from disease onset is consistent with the rapid upregulation of the corresponding chemokines during COVID-19 and the observation that their plasma concentration remains 360 above baseline for up to at least 6 months post infection. This is unlikely to be related to chronic SARS-CoV-2 infection because antiviral antibodies decrease during this time <sup>47</sup>. Rather, the findings are consistent with the persistence of the autoantigen within germinal centers, leading to continuous generation of antibody-secreting plasma cells <sup>56</sup>. We cannot exclude that the overall lack of correlation between plasma chemokine concentration and autoantibody level 365 may be due to timing of sampling and different half-life of antibodies and chemokines in plasma, or that plasma levels may not reflect chemokine concentrations in tissues that could be more relevant for antibody induction. Further highlighting the complexity of the phenomenon, antibodies are not induced against some of the chemokines that are remarkably increased during COVID-19 (*e.g.* CCL3, CCL4 and CXCL9).

370 Chemokines play an important role in infectious diseases and in autoimmune disorders <sup>18, 57, 58, 59</sup>. We find anti-chemokine antibodies in these illnesses, but the patterns are different when compared to each other and to COVID-19. In HIV-1, a chronic viral infection, antibodies are significantly enhanced against more than half of all the chemokines, but do not include antibodies to either CCL19 or CXCL17, which are characteristic of COVID-19. Antibodies to 375 the chemokine ligands of the HIV-1 coreceptors (CXCR4 and CCR5) are also detected at higher levels <sup>60</sup>. In contrast, *Borrelia* infection does not induce development of anti-chemokine antibodies, with the sole exception of anti-CXCL14 IgGs. Autoantibodies in the three autoimmune disorders considered in our study (AS, RA, SjS) are generally similar to each other, but distinct from those in viral infection. We speculate that these differences reflect the 380 unique role of chemokines in each of these diseases.

Infection can trigger antibody polyreactivity and autoimmunity that are generally deleterious<sup>61, 62, 63</sup>. Since here we show that post-infectious autoantibodies can be associated with positive outcomes, we favor the view of post-infectious autoantibodies as disease  
385 modifiers. In COVID-19, the infection induces the expression of chemokines, leading to a pro-inflammatory milieu that clears infected cells but also causes collateral damage<sup>20, 24, 27, 28, 29, 30</sup>. Since anti-chemokine antibodies are present in plasma at concentrations able to modulate cellular migration, the variety and amount of anti-chemokine antibodies that are present or  
390 induced upon infection in each individual may modulate the quality and strength of the inflammatory response, which in turn would impact disease manifestation, severity and long COVID. This could also in part explain the variable lack of success of convalescent plasma treatment in COVID-19<sup>64</sup>, for which donors were selected based on virus neutralizing activity and not for the presence of autoantibodies that could modulate the inflammatory response.

We discovered and characterized the first, human-derived monoclonal antibodies  
395 against four chemokines, including anti-CXCL13 and anti-CXCL16 antibodies that are relevant as predictors of long COVID. Consistent with the 2-step model of chemokine receptor activation<sup>45, 65</sup>, all the N-loop antibodies that were tested effectively reduced chemotaxis. Anti-inflammatory compounds, such as steroids and IL-6 blockers, are currently deployed in the clinic against COVID-19. Further studies are needed to determine whether agents that target  
400 the chemokine system could impact positively on the inflammatory phase of COVID-19 and reduce the development of long COVID.

## MATERIAL AND METHODS

### 405 *Major Resources Table*

| REAGENT or RESOURCE                                                                                           | SOURCE                                                                                                                                                  | IDENTIFIER                          |
|---------------------------------------------------------------------------------------------------------------|---------------------------------------------------------------------------------------------------------------------------------------------------------|-------------------------------------|
| <b>Antibodies</b>                                                                                             |                                                                                                                                                         |                                     |
| Anti-human CD14, APC-eFluor780, clone 61D3                                                                    | Thermo Fisher Scientific                                                                                                                                | Cat#47-0149-42;<br>RRID:AB_1834358  |
| Anti-human CD16, APC-eFluor780, clone eBioCB16 (CB16)                                                         | Thermo Fisher Scientific                                                                                                                                | Cat#47-0168-41;<br>RRID:AB_11219083 |
| Anti-human CD20, PE-Cy7, clone L27 (IVD)                                                                      | BD Biosciences                                                                                                                                          | Cat#335828;<br>RRID:AB_2868689      |
| Anti-human CD3, APC-eFluor780, clone OKT3                                                                     | Thermo Fisher Scientific                                                                                                                                | Cat#47-0037-41;<br>RRID:AB_2573935  |
| Anti-human CD8a, APC-eFluor780, clone OKT8                                                                    | Thermo Fisher Scientific                                                                                                                                | Cat#47-0086-42;<br>RRID:AB_2573945  |
| Anti-human IgG, HRP-linked whole Ab                                                                           | GE Healthcare                                                                                                                                           | Cat# NA933;<br>RRID:AB_772208       |
| mAb aCCL8.001                                                                                                 | This paper                                                                                                                                              | n/a                                 |
| mAb aCCL8.003                                                                                                 | This paper                                                                                                                                              | n/a                                 |
| mAb aCCL8.004                                                                                                 | This paper                                                                                                                                              | n/a                                 |
| mAb aCCL8.005                                                                                                 | This paper                                                                                                                                              | n/a                                 |
| mAb aCCL20.001                                                                                                | This paper                                                                                                                                              | n/a                                 |
| mAb aCXCL13.001                                                                                               | This paper                                                                                                                                              | n/a                                 |
| mAb aCXCL13.002                                                                                               | This paper                                                                                                                                              | n/a                                 |
| mAb aCXCL13.003                                                                                               | This paper                                                                                                                                              | n/a                                 |
| mAb aCXCL16.001                                                                                               | This paper                                                                                                                                              | n/a                                 |
| mAb aCXCL16.002                                                                                               | This paper                                                                                                                                              | n/a                                 |
| mAb aCXCL16.003                                                                                               | This paper                                                                                                                                              | n/a                                 |
| mAb Z021                                                                                                      | Robbiani et al., 2017                                                                                                                                   | n/a                                 |
| <b>Bacterial and virus strains</b>                                                                            |                                                                                                                                                         |                                     |
| One Shot™ TOP10 Chemically Competent <i>E. coli</i>                                                           | Thermo Fisher Scientific                                                                                                                                | Cat#C404006                         |
| <b>Biological samples</b>                                                                                     |                                                                                                                                                         |                                     |
| Blood Specimens of SARS-CoV-2 infected or convalescent individuals (original cohort, Lugano, Switzerland)     | Clinica Luganese Moncucco (CLM)                                                                                                                         | n/a                                 |
| Plasma Specimens of SARS-CoV-2 infected or convalescent individuals (validation cohort 1, Milan, Italy)       | Humanitas Research Hospital                                                                                                                             | n/a                                 |
| Serum Specimens of SARS-CoV-2 infected or convalescent individuals (validation cohort 2, Zurich, Switzerland) | University Hospital Zurich, the City Hospital Triemli Zurich, the Limmattal Hospital, and the Uster Hospital                                            | n/a                                 |
| Blood Specimens of SARS-CoV-2 unexposed individuals or from pre-pandemic blood bank donors                    | Institute for Research in Biomedicine (IRB)                                                                                                             | n/a                                 |
| Plasma Specimens of COVID-19-vaccinated individuals                                                           | CLM; IRB                                                                                                                                                | n/a                                 |
| Plasma Specimens of HIV-1-infected individuals                                                                | Cecchinato et al., 2017                                                                                                                                 | n/a                                 |
| Plasma Specimens of individuals with AS or RA                                                                 | University of Zurich (UZH)                                                                                                                              | n/a                                 |
| Plasma Specimens of individuals with Sjs                                                                      | IRCCS San Matteo                                                                                                                                        | n/a                                 |
| Plasma Specimens of individuals with Lyme disease                                                             | The Valley Hospital (Ridgewood, NJ, USA) and Lyme & Tick-borne Disease Research Center at Columbia University Irving Medical Center (New York, NY, USA) | n/a                                 |
| Blood Specimens from buffy coats                                                                              | Swiss Red Cross                                                                                                                                         | n/a                                 |

| <b>Chemicals, peptides, and recombinant proteins</b>        |                          |                                                                                                                       |
|-------------------------------------------------------------|--------------------------|-----------------------------------------------------------------------------------------------------------------------|
| Human CCL7                                                  | Clark-Lewis et al., 1997 | n/a                                                                                                                   |
| Human CCL8                                                  | Peprtech or this paper   | Cat#300-15 or n/a                                                                                                     |
| Human CCL20                                                 | Clark-Lewis et al., 1997 | n/a                                                                                                                   |
| Human CXCL8                                                 | Clark-Lewis et al., 1997 | n/a                                                                                                                   |
| Human CXCL13                                                | Clark-Lewis et al., 1997 | n/a                                                                                                                   |
| Human CXCL16                                                | Peprtech                 | Cat#300-55                                                                                                            |
| NeutrAvidin protein                                         | Thermo Fisher Scientific | Cat#3100                                                                                                              |
| Streptavidin-Alexa Fluor-647                                | BioLegend                | Cat#405237                                                                                                            |
| Streptavidin-BV711                                          | BD Biosciences           | Cat#563262                                                                                                            |
| Streptavidin-PE                                             | Thermo Fisher Scientific | Cat#12-4317-87                                                                                                        |
| Albumin from chicken egg white                              | Sigma-Aldrich            | Cat#A5503                                                                                                             |
| SARS-CoV-2 RBD                                              | Robbiani et al., 2020    | n/a                                                                                                                   |
| Synthetic biotinylated peptides (see Supplementary Table 2) | GenScript (Hong Kong)    | <a href="https://www.genscript.com/">https://www.genscript.com/</a>                                                   |
| <b>Critical commercial assays</b>                           |                          |                                                                                                                       |
| EZ-Link™ Sulfo-NHS-LC-Biotinylation Kit                     | Thermo Fisher Scientific | Cat#21435                                                                                                             |
| Pan B-cell Isolation kit (human)                            | Milteny Biotech          | Cat#130-101-638                                                                                                       |
| CD14 MicroBeads (human)                                     | Milteny Biotech          | Cat#130-050-201                                                                                                       |
| CD19 MicroBeads (human)                                     | Milteny Biotech          | Cat#130-050-301                                                                                                       |
| Pierce™ TMB Substrate Kit                                   | Thermo Fisher Scientific | Cat#34021                                                                                                             |
| Zombie NIR™ Fixable Viability Kit                           | BioLegend                | Cat#423105                                                                                                            |
| <b>Experimental models: Cell lines</b>                      |                          |                                                                                                                       |
| 293T <sub>ACE2</sub>                                        | Robbiani et al., 2020    | n/a                                                                                                                   |
| HEK293T (ATCC CRL-11268)                                    | Robbiani et al., 2020    | n/a                                                                                                                   |
| Expi293F                                                    | Thermo Fisher Scientific | Cat#A14527                                                                                                            |
| PreB 300.19 murine cell line expressing hCCR2               | Ogilvie et al., 2001     | n/a                                                                                                                   |
| PreB 300.19 murine cell line expressing hCCR6               | Loetscher et al., 1997   | n/a                                                                                                                   |
| PreB 300.19 murine cell line expressing hCXCR6              | Loetscher et al., 1997   | n/a                                                                                                                   |
| PreB 300.19 murine cell line expressing hCXCR1              | Zaslaver et al., 2001    | n/a                                                                                                                   |
| <b>Oligonucleotides</b>                                     |                          |                                                                                                                       |
| Oligonucleotides for antibody cloning                       | Robbiani et al., 2020    | n/a                                                                                                                   |
| <b>Recombinant DNA</b>                                      |                          |                                                                                                                       |
| pCRV1-NLgagPol (pHIV-1 NLgagPol)                            | Schmidt et al., 2020     | n/a                                                                                                                   |
| pNanoLuc2AGFP (pCCNG/nLuc)                                  | Schmidt et al., 2020     | n/a                                                                                                                   |
| pSARS-CoV-2 (2d19)                                          | Schmidt et al., 2020     | n/a                                                                                                                   |
| Human IgG1 heavy-chain vector                               | Robbiani et al., 2020    | n/a                                                                                                                   |
| Human lambda light-chain vector                             | Robbiani et al., 2020    | n/a                                                                                                                   |
| Human kappa light-chain vector                              | Robbiani et al., 2020    | n/a                                                                                                                   |
| <b>Software and algorithms</b>                              |                          |                                                                                                                       |
| Adobe Illustrator 2021                                      | Adobe                    | <a href="https://www.adobe.com/">https://www.adobe.com/</a>                                                           |
| FlowJo Software (version 10.7.1)                            | Three Star               | <a href="https://www.flowjo.com/">https://www.flowjo.com/</a>                                                         |
| Gen5 Software                                               | Agilent                  | <a href="https://www.agilent.com/">https://www.agilent.com/</a>                                                       |
| Glomax software                                             | Promega                  | <a href="https://www.promega.com/">https://www.promega.com/</a>                                                       |
| IgPipeline                                                  | Robbiani et al., 2020    | <a href="https://www.github.com/stratust/igpipeline">https://www.github.com/stratust/igpipeline</a>                   |
| Microsoft Excel                                             | Microsoft Excel          | <a href="https://www.microsoft.com/en-gb/">https://www.microsoft.com/en-gb/</a>                                       |
| Prism 9 (version 9.0.2)                                     | GraphPad Software        | <a href="https://www.graphpad.com/scientific-software/prism/">https://www.graphpad.com/scientific-software/prism/</a> |



|                                               |                                                                                                                                       |                                                                     |
|-----------------------------------------------|---------------------------------------------------------------------------------------------------------------------------------------|---------------------------------------------------------------------|
| Pretty Heatmaps (pheatmap) R package v 1.0.12 | <a href="https://cran.r-project.org/web/packages/pheatmap/index.html">https://cran.r-project.org/web/packages/pheatmap/index.html</a> | n/a                                                                 |
| PyMOL 2.5.0                                   | Schrödinger, Inc.                                                                                                                     | <a href="https://pymol.org">https://pymol.org</a>                   |
| Rtsne R package v 0.15                        | <a href="https://cran.r-project.org/web/packages/Rtsne/">https://cran.r-project.org/web/packages/Rtsne/</a>                           | n/a                                                                 |
| SnapGene 5.3.2                                | SnapGene                                                                                                                              | <a href="https://www.snapgene.com">https://www.snapgene.com</a>     |
| R 4.1.1                                       | R Development Core Team                                                                                                               | <a href="https://www.r-project.org/">https://www.r-project.org/</a> |
| RStudio 2021.09.0                             | RStudio                                                                                                                               | <a href="https://www.rstudio.com/">https://www.rstudio.com/</a>     |
| <b>Other</b>                                  |                                                                                                                                       |                                                                     |
| Dimethyl sulfoxide                            | Sigma-Aldrich                                                                                                                         | Cat#41640                                                           |
| Histopaque                                    | Sigma-Aldrich                                                                                                                         | Cat#H8889                                                           |
| Medium Expi293 Expression                     | Thermo Fisher Scientific                                                                                                              | Cat#A1435102                                                        |
| Medium GIBCO FreeStyle 293 Expression         | Thermo Fisher Scientific                                                                                                              | Cat#12338026                                                        |
| Pasteurized Plasma Protein Solution           | Swiss Red Cross Laboratory                                                                                                            | n/a                                                                 |
| Polyethylenimine Max PEI-MAX                  | Polysciences                                                                                                                          | Cat#24765-1                                                         |
| Protein G Sepharose™ 4 Fast Flow              | Cytiva                                                                                                                                | Cat#17-0618-01P                                                     |
| RNasin Ribonuclease Inhibitors                | Promega                                                                                                                               | Cat#N2615                                                           |
| RPMI 1640 Medium, Hepes, no glutamine         | Thermo Fisher Scientific                                                                                                              | Cat#42401018                                                        |

### ***Study participants and ethical approvals***

COVID-19 original cohort (Lugano): 71 participants, diagnosed with COVID-19 at the Clinica  
410 Luganese Moncucco (CLM, Switzerland) between 08.03.2020 and 22.11.2020, were enrolled  
in the study and divided into two groups, according to the severity of the acute disease. The  
hospitalized group included 50 participants; the outpatient group included 21 close contacts of  
the hospitalized group, who only received at-home care. Inclusion criteria for the hospitalized  
group were a SARS-CoV-2 positive nasopharyngeal swab test by real-time reverse  
415 transcription-polymerase chain reaction (RT-PCR) and age  $\geq 18$  years. Inclusion criteria for the  
outpatient group were being a symptomatic close contact (living in the same household) of an  
individual enrolled in the hospitalized group and age  $\geq 18$  years. Serologic tests confirmed  
COVID-19 positivity for all the participants (Fig. 1a; Extended Data Fig. 4a). At the 12-month  
visit, participants were asked to indicate the presence or absence of persisting symptoms related  
420 to COVID-19 according to a questionnaire. The study was performed in compliance with all  
relevant ethical regulations and the study protocols were approved by the Ethical Committee of  
the Canton Ticino (ECCT): CE-3428 and CE-3960.

COVID-19 validation cohort 1 (Milan): 44 participants, diagnosed with COVID-19 and  
425 hospitalized at the Humanitas Research Hospital (Milan, Italy)  
between 10.03.2020 and 29.03.2021, were enrolled in the study. Inclusion criteria were a

SARS-CoV-2 positive nasopharyngeal swab test by RT-PCR and age  $\geq 18$  years. Serologic tests confirmed COVID-19 positivity for the participants who were not tested by RT-PCR. Individuals were stratified in mild or severe depending on duration of hospitalization (mild:  $\leq 5$  430 days; severe:  $\geq 7$  days). The study was performed in compliance with all relevant ethical regulations and the study protocols were approved by the Ethical Committee of Humanitas Research Hospital (authorization n° 738/20 and n° 956/20).

COVID-19 validation cohort 2 (Zurich)<sup>15</sup>: 104 participants, diagnosed with COVID-19 at the 435 University Hospital Zurich, the City Hospital Triemli Zurich, the Limmattal Hospital or the Uster Hospital between April 2020 and April 2021, were included in the study and divided into two groups, according to the severity of the acute disease. The hospitalized group included 38 participants, whereas the outpatient group included 66 individuals, who only received at-home care. Inclusion criteria for the participants were a SARS-CoV-2-positive 440 nasopharyngeal swab test by RT-PCR and age  $\geq 18$  years. At the 13-month visit, blood was collected, and participants were asked by trained study physicians to indicate the presence or absence of persisting symptoms related to COVID-19. The study was performed in compliance with all relevant ethical regulations and the study protocols were approved by the Cantonal Ethics Committee of Zurich (BASEC #2016-01440).

445 Control cohort: 15 adult participants ( $\geq 18$  years) with self-reported absence of prior SARS-CoV-2 infection or vaccination (confirmed by negative serologic test, Extended Data Fig. 4a) were enrolled between November 2020 and June 2021. Additional 8 pre-pandemic samples were obtained from blood bank donors (ECCT: CE-3428). Serologic tests confirmed 450 COVID-19 negativity for all controls (Fig. 1a; Extended Data Fig. 4a).

Vaccination cohort: 16 adult participants ( $\geq 18$  years) with self-reported absence of prior SARS-CoV-2 infection (confirmed by negative serologic test, Extended Data Fig. 5f) and who received two doses of mRNA-based COVID-19 vaccine<sup>66,67</sup>, were enrolled on the day of first 455 vaccine dose or earlier, between November 2020 and June 2021 (ECCT: CE-3428).

HIV-1 and autoimmune diseases cohorts: Pre-pandemic plasma samples were obtained from the following participants: 24 HIV-1 positive (ECCT: CE-813)<sup>68</sup>, 13 each with Ankylosing Spondylitis, Rheumatoid Arthritis (ECCT: CE-3065, and Ethical Committee of the Canton

460 Zurich EK-515), or Sjögren's syndrome (IRCCS Policlinico San Matteo Foundation Ethics Committee n.20070001302).

Lyme disease cohort: Plasma samples of 27 individuals with erythema migrans (Lyme disease) and 30 controls were obtained at The Valley Hospital (Ridgewood, NJ, USA) and Lyme & 465 Tick-borne Disease Research Center at Columbia University Irving Medical Center (New York, NY, USA) between 2015 and 2019. All were between 18-89 years of age and all denied being immunocompromised. Lyme disease cohort: Individuals had new or recent onset erythema migrans, exposure to a Lyme endemic area in the prior 30 days and received no more than 3 weeks of antibiotic treatment. Healthy control cohort: Individuals reported being 470 medically healthy, had an unremarkable physical exam and blood tests, had no signs or symptoms of infection or illness, denied having had a diagnosis and/or treatment for Lyme and/or another tick-borne disease within the past 5 years, and denied having a tick bite in the prior 6 months. The Lyme cohort samples were collected at the time of the erythema migrans and 6 months later in average. The study was performed in compliance with all relevant ethical 475 regulations and the study protocol was approved by the New York State Psychiatric Institute Institutional Review Board (#6805).

Written informed consent was obtained from all participants, and all samples were coded. Demographic, clinical, and serological features of the cohorts are reported in Supplementary 480 Tables 1 and 3.

### ***Blood collection, processing, and storage***

Blood was collected by venipuncture at approximately 6-month intervals and the peripheral blood mononuclear cells (PBMCs) were isolated using Histopaque density centrifugation 485 (Lugano and control cohort). Total PBMCs were aliquoted and frozen in liquid nitrogen in the presence of fetal calf serum and DMSO. Plasma was aliquoted and stored at -20°C or less. Before use, plasma aliquots were heat-inactivated (56°C for 1 h) and then stored at 4°C. For chemotaxis assays, CD14<sup>+</sup> monocytes and CD19<sup>+</sup> B cells were enriched from fresh PBMCs derived from blood donors (Swiss Red Cross Laboratory; ECCT: CE-3428) 490 through positive immunoselection (130-050-201 and 130-050-301, respectively [Miltenyi Biotec, Bergisch Gladbach, Germany]) according to the manufacturer's instructions. After isolation, CD19<sup>+</sup> B cells were rested overnight in RPMI-1640 medium supplemented with 10%

(v/v) fetal bovine serum (FBS), 1% (v/v) non-essential amino acids, 1 mM sodium pyruvate, 2 mM GlutaMAX, 50  $\mu$ M  $\beta$ -Mercaptoethanol and 50 U/ml penicillin/streptomycin (all from  
495 Gibco) before being used in chemotactic assays. For the other cohorts, see references<sup>15, 69</sup>.

## ***Reagents***

**Peptides:** Synthetic peptides containing the N-loop or the C-terminal sequence of human chemokines were designed and obtained (> 75% purity) from GenScript (Hong Kong). All  
500 peptides are biotinylated (biotin-Ahx) at the N-terminus and amidated at the C-terminus. In addition, the first 2-4 amino acids of each peptide (GS, GGS, GGGS, or GGK depending on the length of the N-loop/C-terminus of the chemokine) consist of a linker between the biotin and the chemokine sequence. Peptides are generally 25 amino acids long, or between 22-25 amino acids when synthesis was problematic. The sequence of the IFN $\alpha$ 2 peptide (7-28) was  
505 based on a previously described immunoreactive epitope in myasthenia gravis patients<sup>70</sup>, and the one from the SARS-CoV-2 nucleocapsid protein (N) peptide (157-178) was described in<sup>71</sup>. An irrelevant peptide was used as negative control. The amino acid sequences of all peptides in this study are listed in Supplementary Table 2.

**Proteins:** CCL7, CCL20, CXCL8 and CXCL13 were synthesized using tBoc solid-phase  
510 chemistry<sup>72</sup>. CCL8 and CXCL16 were obtained from Peprotech (Cat#300-15 and Cat#300-55, respectively) or produced and purified in house. Briefly, recombinant chemokines were expressed in *E. coli*, purified from inclusion bodies by immobilized-metal affinity chromatography, and folded under N<sub>2</sub> protection in an arginine-containing buffer (80 mM Tris-Cl [pH 8.5], 100 mM NaCl, 0.8 M arginine, 2 mM EDTA, 1 mM cysteine, 0.2 mM cystine)  
515 as previously described<sup>73</sup>. After recovery and concentration, the purification tag was cleaved with enterokinase, and the processed chemokine was purified by C<sub>18</sub> reverse phase chromatography. The SARS-CoV-2 receptor binding domain (RBD) was produced and purified as described<sup>74</sup>.

## 520 ***Chemotaxis***

The migration of primary human monocytes and B cells isolated from buffy coats, or of murine preB 300.19 cells stably expressing the human chemokine receptors CCR2<sup>75</sup>, CCR6, CXCR1<sup>76</sup> and CXCR6<sup>77</sup> was assayed using 48-well Boyden chambers (Neuro Probe, Cabin John, MD) with polyvinylpyrrolidone-free polycarbonate membranes with pore size of 3  $\mu$ m for primary

525 human B cells and 5  $\mu\text{m}$  for the other cell types, as previously described<sup>78</sup>. Briefly,  $10^5$  primary  
human B cells or  $5 \times 10^4$  primary human monocytes and murine preB 300.19 cells were diluted  
in RPMI-1640 supplemented with 20 mM HEPES, pH7.4, and 1% pasteurized plasma protein  
solution (5% PPL SRK; Swiss Red Cross Laboratory, Bern, Switzerland). Cells were then  
added to the upper wells and the chemokine (with or without antibodies) to the bottom wells.  
530 After 120 min of incubation for primary human B cells and 90 min for the other cell types, the  
membrane was removed, washed on the upper side with phosphate-buffered saline (PBS),  
fixed, and stained with DiffQuik. All assays were done in triplicate, and for each well the  
migrated cells were counted at 100-fold magnification in 5 randomly selected high-power  
fields (5HPF).

535 Inhibition of chemotaxis by monoclonal antibodies (Fig. 2f,h; Extended Data Fig. 8g,j):  
Experiments were performed with monoclonal antibodies at a final concentration of 30  $\mu\text{g}/\text{ml}$   
(Extended Data Fig. 8g) or 50  $\mu\text{g}/\text{ml}$  (Fig. 2f,h; Extended Data Fig. 8j). Baseline migration was  
determined in the absence of chemoattractant (buffer control).

Inhibition of chemotaxis by plasma purified IgGs (Extended Data Fig. 8k): IgGs were purified  
540 from a subset of samples of the COVID-19 and uninfected control cohorts using Protein G  
Sepharose 4 Fast Flow (Cytiva) according to manufacturer's instructions (plasma:resuspended  
beads at a 5:4 [v/v] ratio), buffer-exchanged and concentrated in PBS by Amicon Ultra-4  
centrifugal filters (30 kDa cutoff, Millipore). Chemotaxis of preB 300.19 expressing CCR2 or  
CXCR1 was performed at a final IgG concentration of 200  $\mu\text{g}/\text{ml}$  (IgG concentration in human  
545 serum:  $\sim 10^5$   $\mu\text{g}/\text{ml}$ <sup>49</sup>), in the presence of the chemokine concentration resulting in peak  
migration when no antibodies were added (CCL7 [100nM], CCL8 [100nM], CXCL8 [1nM]).

## ***ELISA***

550 To evaluate the antibodies' binding to chemokine peptides, 96-well plates (ThermoFisher,  
442404) or 384-well plates (ThermoFisher, 464718) were coated with 50  $\mu\text{l}$  (or 10  $\mu\text{l}$  for 384-  
well plates) per well of a 2 $\mu\text{g}/\text{ml}$  Neutravidin (Life Technologies, 31000) solution in PBS,  
overnight at room temperature. Plates were washed 4 times with washing buffer (PBS + 0.05%  
Tween-20 [Sigma-Aldrich]) and incubated with 50  $\mu\text{l}$  (or 10  $\mu\text{l}$  for 384-well plates) per well of  
555 a 50 nM biotinylated peptide solution in PBS for 1 h at room temperature. After washing 4  
times with washing buffer, plates were incubated with 200  $\mu\text{l}$  (or 50  $\mu\text{l}$  for 384-well plates) per  
well of blocking buffer (PBS + 2% BSA + 0.05% Tween-20) for 2 h at room temperature.

Plates were then washed 4 times with washing buffer, and serial dilutions of monoclonal antibodies or plasma were added in PBS + 0.05% Tween-20 and incubated for 1 h at room temperature. To screen for the presence of anti-chemokine IgGs, plasma samples were assayed (unless otherwise stated) at 1:50 starting dilution followed by 3 fourfold serial dilutions (1:200, 1:800, 1:3200). Monoclonal antibodies were tested at 5 µg/ml starting concentration followed by 11 threefold serial dilutions. Plates were subsequently washed 4 times with washing buffer and incubated with anti-human IgG secondary antibody conjugated to horseradish peroxidase (HRP) (GE Healthcare, NA933) at a 1:5000 dilution in PBS + 0.05% Tween-20. Finally, after washing 4 times with washing buffer, plates were developed by the addition of 50 µl (or 10 µl for 384-well plates) per well of the HRP substrate TMB (ThermoFisher, 34021) for 10 min. The developing reaction was stopped with 50 µl (or 10 µl for 384-well plates) per well of a 1 M H<sub>2</sub>SO<sub>4</sub> solution, and absorbance was measured at 450 nm with an ELISA microplate reader (BioTek) with Gen5 software. A positive control (broadly reactive plasma from donor CLM70) and negative control (uninfected participant) samples were included in each experiment. Since the basal average optical density likely also depends on intrinsic features of each peptide that is used to coat the ELISA plate, the presented values should be interpreted as relative rather than absolute. The Area Under the Curve (AUC) was obtained from two independent experiments and plotted with GraphPad Prism. The main findings were further confirmed by assaying subsets of samples belonging to the different groups, side-by-side on the same plates (data not shown).

Lyme disease cohort (Extended Data Fig. 9b): Plasma was assayed at a 1:100 starting dilution, followed by 2 additional four-fold dilutions (1:400 and 1:1600).

Reactivity at 6 versus 12 months (Extended Data Fig. 5b,c): Experiments were performed with plasma samples from different time points side-by-side on the same plate. In Extended Data Fig. 5b, plasma was assayed at a 1:50 starting dilution, followed by 4 additional fivefold dilutions. Anti-RBD IgG levels were measured in COVID-19 convalescents, who had not received a COVID-19-mRNA vaccine between first and second visit (no vaccination) or in individuals with at least one dose of vaccine at least 10 days before blood sampling at the second visit (Extended Data Fig. 5b; see Supplementary Table 1).

Kinetic of signature anti-chemokine IgG antibodies (Extended Data Fig. 5e): Experiments were performed with plasma samples from different time points assayed at 1:50 dilution side-by-side on the same plate, and the average optical density at 450 nm obtained from two independent experiments was plotted with GraphPad Prism.

IgG antibodies binding to SARS-CoV-2 RBD (Figs. 1a and 2b; Extended Data Fig. 4a,c,d; Extended Data Fig. 5b,f; Extended Data Fig. 6c): Experiments were performed with 96-well plates coated with 50 µl per well of a 5 µg/ml protein solution in PBS overnight at room temperature, and subsequently blocked and treated as described above. In this case, plasma samples were assayed either at a 1:50 starting dilution followed by 7 additional threefold serial dilutions (Figs. 1a and 2b; Extended Data Fig. 4a,c,d; Extended Data Fig. 6c) or followed by 3 additional fivefold serial dilutions (Extended Data Fig. 5b,f).

### ***Chemokine quantification in plasma***

Plasma levels of 14 chemokines were measured using the Luminex Discovery Assay - Human Premixed Multi-Analyte Kit (R&D Systems, LXXAHM-14) following the manufacturer's instructions. Chemokines included in the panel were: CCL2, CCL3, CCL4, CCL19, CCL21, CCL22, CCL25, CXCL2, CXCL5, CXCL8, CXCL9, CXCL10, CXCL13 and CXCL16. Each sample was measured in duplicate using a Luminex FLEXMAP 3D system.

### ***Single cell sorting by flow cytometry***

B cells were enriched from PBMCs of uninfected controls or of COVID-19 convalescent individuals 6 months after COVID-19 (participant CLM9 for anti-CCL8 antibodies; CLM64 for anti-CCL20 antibodies; CLM5, CLM7 and CLM33 for anti-CXCL13 antibodies; and CLM8 and CLM30 for anti-CXCL16 antibodies), using the pan-B-cell isolation kit according to manufacturer's instructions (Miltenyi Biotec, 130-101-638). The enriched B cells were subsequently stained in FACS buffer (PBS + 2% FCS + 1mM EDTA) with the following antibodies/reagents (all 1:200 diluted) for 30 min on ice: anti-CD20-PE-Cy7 (BD Biosciences, 335828), anti-CD14-APC-eFluor 780 (Thermo Fischer Scientific, 47-0149-42), anti-CD16-APC-eFluor 780 (Thermo Fischer Scientific, 47-0168-41), anti-CD3-APC-eFluor 780 (Thermo Fischer Scientific, 47-0037-41), anti-CD8-APC-eFluor 780 (Invitrogen, 47-0086-42), Zombie NIR (BioLegend, 423105), as well as fluorophore-labeled ovalbumin (Ova) and N-loop peptides. Live single Zombie-NIR<sup>-</sup>CD14<sup>-</sup>CD16<sup>-</sup>CD3<sup>-</sup>CD8<sup>-</sup>CD20<sup>+</sup>Ova<sup>-</sup>N-loop-PE<sup>+</sup>N-loop-AF647<sup>+</sup> B cells were single-cell sorted into 96-well plates containing 4 µl of lysis buffer (0.5× PBS, 10 mM DTT, 3,000 units/ml RNasin Ribonuclease Inhibitors [Promega, N2615]) per well using a FACS Aria III, and the analysis was performed with FlowJo software. The anti-CCL20 antibody sequences were obtained by sorting with a pool of 12-peptides; for all

the others, a single peptide was used. The sorted cells were frozen on dry ice and stored at  $-80^{\circ}\text{C}$ .

625

### ***Antibody sequencing, cloning, production and purification***

Antibody genes were sequenced, cloned and expressed as previously reported<sup>79, 80, 81</sup>. Briefly, reverse-transcription of RNA from FACS-sorted single cells was performed to obtain cDNA, which was then used for amplification of the immunoglobulin IGH, IGK and IGL genes by nested PCR. Amplicons from this first PCR reaction served as templates for sequence and ligation independent cloning (SLIC) into human IgG1 antibody expression vectors. Monoclonal antibodies were produced by transiently transfecting Expi293F cells cultured in Freestyle-293 Expression Medium (ThermoFisher) with equal amounts of Ig heavy and light chain expression vectors using polyethylenimine Max (PEI-MAX, Polysciences) as a transfection reagent. After 6-7 days of culture, cell supernatants were filtered through 0.22  $\mu\text{m}$  Millex-GP filters (Merck Millipore), and antibodies were purified using Protein G Sepharose 4 Fast Flow (Cytiva) according to manufacturer's instructions and buffer-exchanged and concentrated in PBS by Amicon Ultra-4 centrifugal filters (30 kDa cutoff, Millipore). Where indicated, the anti-Zika virus monoclonal antibody Z021<sup>79</sup> was used as an isotype control.

### ***Computational analysis of antibody sequences***

Antibody sequences were analyzed using a collection of Perl and R scripts provided by IgPipeline and publicly available on GitHub (<https://github.com/stratust/igpipeline>)<sup>46</sup>. In brief, sequences were annotated using IgBlast<sup>82</sup> v 1.14.0 with IMGT domain delineation system and the Change-O toolkit v 0.4.5<sup>83</sup>. CDR3 sequences were determined by aligning the IGHV and IGLV nucleotide sequence against their closest germlines using the blastn function of IgBlast.

### ***SARS-CoV-2 pseudotyped reporter virus and neutralization assay***

To generate (HIV-1/NanoLuc2AEGFP)-SARS-CoV-2 particles, HEK293T cells were co-transfected with the three plasmids pHIV<sub>NL</sub>GagPol, pCCNanoLuc2AEGFP, and SARS-CoV-2 S as described elsewhere<sup>46, 84</sup>. Supernatants containing virions were collected 48 h after transfection, and virion infectivity was determined by titration on 293T<sub>ACE2</sub> cells. The plasma neutralizing activity was measured as previously reported<sup>46, 84</sup>.

655



Briefly, threefold serially diluted plasma samples (from 1:50 to 1:328'050) were incubated with SARS-CoV-2 pseudotyped virus for 1h at 37 °C, and the virus-plasma mixture was subsequently incubated with 293T<sub>ACE2</sub> cells for 48 h. Cells were then washed with PBS and lysed with Luciferase Cell Culture Lysis 5× reagent (Promega). Nanoluc Luciferase activity  
660 in cell lysates was measured using the Nano-Glo Luciferase Assay System (Promega) with Modulus II Microplate Reader User interface (TURNER BioSystems). The obtained relative luminescence units were normalized to those derived from cells infected with SARS-CoV-2 pseudotyped virus in the absence of plasma. The NT<sub>50</sub> values were determined using four-parameter nonlinear regression with bottom and top constrains equal to 0 and 1,  
665 respectively (GraphPad Prism). The dotted line (NT<sub>50</sub>=5) in the plots represents the lower limit of detection of the assay.

### ***Model interaction between chemokine and chemokine receptor***

The illustrative model in Extended Data Fig. 1b was generated from the structure of inactive  
670 CCR2 (PDB code: 5T1A) <sup>85</sup>, together with the electron microscopy structures of CCR5 and CCR6 (PDB codes: 6MEO and 6WWZ, respectively) <sup>86,87</sup> by using SWISS-MODEL <sup>88</sup> server and the molecular graphics program PyMOL 2.5.0 for modeling the N- and C-terminus of the receptor. The crystal structure of CCL8 (MCP-2) (PDB code: 1ESR) <sup>89</sup>, and the electron microscopy structure of CCR6 <sup>87</sup> were used to model the complex. The intracellular residues  
675 were removed for clarity.

### ***Statistical analysis***

Tests for statistical significance: Upon testing of parametric assumptions, statistical  
680 significance between two groups was determined using either parametric paired two-tailed Student's t test, or non-parametric two-tailed Mann–Whitney U-tests (unpaired samples), or Wilcoxon signed-rank test (paired samples). Statistical significance between more than two groups was evaluated using Kruskal-Wallis test (followed by Dunn multiple comparisons), one-way ANOVA (followed by Tukey multiple comparisons), or two-way Repeated Measures ANOVA (followed by Šídák multiple comparisons), as described in the figure legends.  
685 Statistical significance of the signature chemokines (CCL19, CCL22, CXCL17, CXCL8, CCL25, CXCL5, CCL21, CXCL13 and CXCL16) was also confirmed when applying the Bonferroni criterion in order to guarantee a familywise level of significance equal to 0.05. Statistical significance from a 2x2 contingency table was determined with Fisher's exact test.

Correlations were assessed using Pearson correlation analysis. A p-value of less than 0.05 was  
690 considered statistically significant. In the figures, significance is shown as follow: ns  $p \geq 0.05$   
(not significant), \* $p < 0.05$ , \*\* $p < 0.01$ , \*\*\* $p < 0.001$  and \*\*\*\* $p < 0.0001$ . Data and statistical  
analyses were performed with GraphPad Prism.

t-SNE: t-SNE analysis was performed using the Rtsne R package v 0.15 ([https://CRAN.R-  
project.org/package=Rtsne](https://CRAN.R-project.org/package=Rtsne)) using the AUC values for all chemokines. The theta parameter for  
695 the accuracy of the mapping was set to zero in all cases for exact t-SNE.

Clustering: Hierarchical clustering was created using the hclust R function v 4.1.1. Clustering  
analysis was performed using the correlation as distance and the Ward's method as  
agglomerative criterion. Heatmaps were created with either GraphPad Prism (Fig. 1a;  
Extended Data Fig. 2d) or the *Pretty Heatmaps (pheatmap)* R package v 1.0.12 (Extended Data  
700 Fig. 10b). In Extended Data Fig. 10b, each column containing a distinct chemokine was scaled  
with the scaling function provided by R, which sets the mean and the standard deviation to 0  
and 1, respectively.

Logistic regression and additional analyses: Logistic regression was performed using the GLM  
(Generalized Linear Models) function provided by the R package v 4.1.1. To identify which  
705 variables to include in the analysis, AUCs were ranked according to the p-value obtained with  
a Mann-Whitney-Wilcoxon nonparametric test on the Lugano cohort. The first N variables  
minimizing the AIC (Akaike information criterion) were then used in the fitting. Furthermore,  
the same set of variables was used to perform the fitting with the Milan and Zurich cohorts. In  
each plot, values from 0 to 0.5 and from 0.5 to 1 on the y-axis represent the assignment of  
710 individuals to the A and B groups (of a Prediction A versus B; see grey backgrounds),  
respectively. On the x-axis, samples are divided into the two groups and subsequently ordered  
according to sample ID as shown in Supplementary Table 1. Dots in the grey area represent  
individuals that are assigned to the correct group. We additionally performed  $\chi^2$ -tests  
considering covariates that are known to influence COVID-19 severity (demographics [gender  
715 and age] and comorbidities [diabetes and cardiovascular diseases]) and found that none of them  
was significantly different between groups. Race/ethnicity was not analyzed because the cohort  
is nearly 100% Caucasian; similarly, immune deficiency was rare and was not considered.  
Logistic regression analysis using the combination of these covariates (age, gender, diabetes  
and cardiovascular diseases) allowed proper assignment with accuracies of 74.6% (COVID-19  
720 severity; outpatient vs hospitalized) and 68.3% (Long COVID; no Sx vs  $\geq 1$  Sx). Notably, the

accuracy using anti-chemokine antibody values is even better (77.5% [COVID-19 severity]) and 77.8% [Long COVID]). These analyses are shown in Supplementary Table 7.

### **Acknowledgments:**

725

We thank all study participants and their families, the medical personnel of the Clinica Luganese Moncucco; Carol Sotsky, Nancy Rioux, Shreya Doshi, and Tarek Hijazi (Lyme disease cohort); Marina Sironi, Roberto Leone, Monica Rimoldi and the Humanitas COVID-19 Task Force (Milan cohort); Sara Hasler, Sarah Adamo, Miro Raeber, Jakob Nilsson, Esther Bächli, Alain Rudiger and Lars Huber (Zurich cohort) and Sandra Jovic (Institute for Research in Biomedicine) for their support and technical assistance. We also acknowledge Thiago Oliveira (Rockefeller University) for sharing the script for the clustering analysis, and Theodora Hatzioannou and Paul Bieniasz (Rockefeller University) for sharing plasmids and protocols for SARS-CoV-2 pseudovirus. ACa thanks Mrs. Flora Gruner for the generous support. This study was also in part financed within the framework of the Swiss HIV Cohort Study using data gathered by the Five Swiss University Hospitals, two Cantonal Hospitals, 15 affiliated hospitals and 36 private physicians (listed in <http://www.shcs.ch/180-health-care-providers>). Members of the Swiss HIV Cohort Study are listed in <https://shcs.ch/184-for-shcs-publications>. We are grateful to Marco Baggiolini for mentoring, support and fruitful discussions.

730

735

740

### **Funding:**

Swiss Vaccine Research Institute (SVRI) (DFR)

National Institutes of Health grant U01 AI151698 (United World Antiviral Research Network, UWARN) (DFR)

745

National Institutes of Health grant P01 AI138938 (DFR)

National Institutes of Health grant U19 AI111825 (DFR)

European Union's Horizon 2020 research and innovation programme grant 101003650 (DFR, LV)

750

Fidinam Foundation (MUg)

Rocca Foundation (Mug, AMant)

Ceschina Foundation (MUg)

Swiss HIV Cohort Study (#719), Swiss National Science Foundation (#201369), and SHCS Research Foundation (MUg, EB, AR)

755 Italian Ministry of Health for COVID-19 COVID-2020-12371640 (AMant)

Dolce & Gabbana fashion house (AMant)

Swiss National Science Foundation: NRP 78 Implementation Programme (CC, OB), #4078P0-198431 (OB), #310030-200669 (OB), and #310030-212240 (OB)

Clinical Research Priority Program CYTIMM-Z of University of Zurich (UZH) (OB)

760 Pandemic Fund of UZH (OB)

Innovation grant of USZ (OB)

Digitalization Initiative of the Zurich Higher Education Institutions Rapid-Action Call #2021.1\_RAC\_ID\_34 (CC)

765 Swiss Academy of Medical Sciences (SAMW) fellowships #323530-191220 (CC) and #323530-191230 (YZ)

Lyme & Tick-Borne Diseases Research Center at Columbia University Irving Medical Center, established by the Global Lyme Alliance, Inc and the Lyme Disease Association, Inc. (BAF)

770 **Author contributions:**

Conceptualization: JMu, VCe, ACa, MUg, DFR

Software: MM, SM, JS, ACa

Validation: JMu, VCe, ACa

Formal Analysis: JMu, VCe, ACa, SM, MBLR

775 Investigation: JMu, VCe, AAS, EG, JMo, TG, FBi

Resources: JMu, TG, PP, FBi, VCr, LP, CT, GD-S, BM, MT, DJ, ST, MP, LV, MB, PAM, AF-P, CG, MUh, EB, AR, ACi, AManz, RF, FBa, AV, GDN, CC, PT, YZ, LAM, BB, AMant, BAF, OB

Writing – Original Draft: JMu, VCe, MUg, DFR

780 Writing – Review & Editing: JMu, VCe, MUg, DFR

Supervision: DFR, MUg

Funding Acquisition: DFR, MUg, ACa, LV, AR, EB, BAF, OB, CC, AMant

785 **Competing interests:** The Institute for Research in Biomedicine has filed a provisional patent application in connection with this work on which JMu, VCe, ACa, MUG and DFR are inventors.

790 **Data and materials availability:** All data are available in the main text or the supplementary materials. Computer code for antibody sequence, logistic regression, clustering and t-SNE analyses will be deposited at GitHub upon publication (<https://github.com>). Material is available upon request and may require MTA.

795

## REFERENCES

1. Huang, C. *et al.* Clinical features of patients infected with 2019 novel coronavirus in Wuhan, China. *Lancet* **395**, 497-506 (2020).  
800
2. Zhang, Q. *et al.* Inborn errors of type I IFN immunity in patients with life-threatening COVID-19. *Science* **370** (2020).
3. Pairo-Castineira, E. *et al.* Genetic mechanisms of critical illness in COVID-19.  
805 *Nature* **591**, 92-98 (2021).
4. Initiative, C.-H.G. Mapping the human genetic architecture of COVID-19. *Nature* **600**, 472-477 (2021).
- 810 5. Zhou, F. *et al.* Clinical course and risk factors for mortality of adult inpatients with COVID-19 in Wuhan, China: a retrospective cohort study. *Lancet* **395**, 1054-1062 (2020).
6. Bastard, P. *et al.* Autoantibodies against type I IFNs in patients with life-threatening  
815 COVID-19. *Science* **370** (2020).
7. Mehandru, S. & Merad, M. Pathological sequelae of long-haul COVID. *Nat Immunol* **23**, 194-202 (2022).
- 820 8. Davis, H.E. *et al.* Characterizing long COVID in an international cohort: 7 months of symptoms and their impact. *EClinicalMedicine* **38**, 101019 (2021).
9. Blomberg, B. *et al.* Long COVID in a prospective cohort of home-isolated patients.  
825 *Nat Med* **27**, 1607-1613 (2021).
10. Nalbandian, A. *et al.* Post-acute COVID-19 syndrome. *Nat Med* **27**, 601-615 (2021).
11. Xie, Y., Xu, E., Bowe, B. & Al-Aly, Z. Long-term cardiovascular outcomes of  
830 COVID-19. *Nat Med* (2022).
12. Xie, Y., Xu, E. & Al-Aly, Z. Risks of mental health outcomes in people with covid-19: cohort study. *BMJ* **376**, e068993 (2022).
13. Merad, M., Blish, C.A., Sallusto, F. & Iwasaki, A. The immunology and  
835 immunopathology of COVID-19. *Science* **375**, 1122-1127 (2022).
14. Phetsouphanh, C. *et al.* Immunological dysfunction persists for 8 months following initial mild-to-moderate SARS-CoV-2 infection. *Nat Immunol* **23**, 210-216 (2022).
- 840 15. Cervia, C. *et al.* Immunoglobulin signature predicts risk of post-acute COVID-19 syndrome. *Nat Commun* **13**, 446 (2022).

- 845 16. Proal, A.D. & VanElzakker, M.B. Long COVID or Post-acute Sequelae of COVID-19 (PASC): An Overview of Biological Factors That May Contribute to Persistent Symptoms. *Front Microbiol* **12**, 698169 (2021).
- 850 17. Bachelierie, F. *et al.* International Union of Basic and Clinical Pharmacology. [corrected]. LXXXIX. Update on the extended family of chemokine receptors and introducing a new nomenclature for atypical chemokine receptors. *Pharmacol Rev* **66**, 1-79 (2014).
18. Chen, K. *et al.* Chemokines in homeostasis and diseases. *Cell Mol Immunol* **15**, 324-334 (2018).
- 855 19. Blanco-Melo, D. *et al.* Imbalanced Host Response to SARS-CoV-2 Drives Development of COVID-19. *Cell* **181**, 1036-1045 e1039 (2020).
20. Liao, M. *et al.* Single-cell landscape of bronchoalveolar immune cells in patients with COVID-19. *Nat Med* **26**, 842-844 (2020).
- 860 21. Paludan, S.R. & Mogensen, T.H. Innate immunological pathways in COVID-19 pathogenesis. *Sci Immunol* **7**, eabm5505 (2022).
- 865 22. Khalil, B.A., Elemam, N.M. & Maghazachi, A.A. Chemokines and chemokine receptors during COVID-19 infection. *Comput Struct Biotechnol J* **19**, 976-988 (2021).
23. Lucas, C. *et al.* Longitudinal analyses reveal immunological misfiring in severe COVID-19. *Nature* **584**, 463-469 (2020).
- 870 24. COMBAT-Consortium. A blood atlas of COVID-19 defines hallmarks of disease severity and specificity. *Cell* **185**, 916-938 e958 (2022).
- 875 25. Su, Y. *et al.* Multi-Omics Resolves a Sharp Disease-State Shift between Mild and Moderate COVID-19. *Cell* **183**, 1479-1495 e1420 (2020).
26. Chevrier, S. *et al.* A distinct innate immune signature marks progression from mild to severe COVID-19. *Cell Rep Med* **2**, 100166 (2021).
- 880 27. Merad, M. & Martin, J.C. Pathological inflammation in patients with COVID-19: a key role for monocytes and macrophages. *Nat Rev Immunol* **20**, 355-362 (2020).
- 885 28. Rendeiro, A.F. *et al.* The spatial landscape of lung pathology during COVID-19 progression. *Nature* **593**, 564-569 (2021).
29. Wendisch, D. *et al.* SARS-CoV-2 infection triggers profibrotic macrophage responses and lung fibrosis. *Cell* **184**, 6243-6261 e6227 (2021).
- 890 30. Griffin, D.O. *et al.* Cytokine storm of a different flavour: The different cytokine signature of SARS-CoV-2, the cause of COVID-19, from the original SARS outbreak. *J Glob Antimicrob Resist* **24**, 90-92 (2021).

31. Mantovani, A. *et al.* Long Covid: where we stand and challenges ahead. *Cell Death Differ* **29**, 1891-1900 (2022).  
895
32. Angriman, F. *et al.* Interleukin-6 receptor blockade in patients with COVID-19: placing clinical trials into context. *Lancet Respir Med* **9**, 655-664 (2021).
33. Proudfoot, A.E. & Ugucioni, M. Modulation of Chemokine Responses: Synergy and Cooperativity. *Front Immunol* **7**, 183 (2016).  
900
34. Kisand, K. *et al.* Chronic mucocutaneous candidiasis in APECED or thymoma patients correlates with autoimmunity to Th17-associated cytokines. *J Exp Med* **207**, 299-308 (2010).  
905
35. Puel, A. *et al.* Recurrent staphylococcal cellulitis and subcutaneous abscesses in a child with autoantibodies against IL-6. *J Immunol* **180**, 647-654 (2008).
36. Kampmann, B. *et al.* Acquired predisposition to mycobacterial disease due to autoantibodies to IFN-gamma. *J Clin Invest* **115**, 2480-2488 (2005).  
910
37. Bastard, P. *et al.* Autoantibodies neutralizing type I IFNs are present in ~4% of uninfected individuals over 70 years old and account for ~20% of COVID-19 deaths. *Sci Immunol* **6** (2021).  
915
38. Damoiseaux, J. *et al.* Autoantibodies and SARS-CoV2 infection: The spectrum from association to clinical implication: Report of the 15th Dresden Symposium on Autoantibodies. *Autoimmun Rev* **21**, 103012 (2021).
- 920 39. Chang, S.E. *et al.* New-onset IgG autoantibodies in hospitalized patients with COVID-19. *Nat Commun* **12**, 5417 (2021).
40. Zuo, Y. *et al.* Prothrombotic autoantibodies in serum from patients hospitalized with COVID-19. *Sci Transl Med* **12** (2020).  
925
41. Zhou, Y. *et al.* Clinical and Autoimmune Characteristics of Severe and Critical Cases of COVID-19. *Clin Transl Sci* **13**, 1077-1086 (2020).
42. van der Wijst, M.G.P. *et al.* Type I interferon autoantibodies are associated with systemic immune alterations in patients with COVID-19. *Sci Transl Med* **13**, eabh2624 (2021).  
930
43. Woodruff, M.C. *et al.* Dysregulated naive B cells and de novo autoreactivity in severe COVID-19. *Nature* **611**, 139-147 (2022).  
935
44. Wang, E.Y. *et al.* Diverse functional autoantibodies in patients with COVID-19. *Nature* **595**, 283-288 (2021).
- 940 45. Crump, M.P. *et al.* Solution structure and basis for functional activity of stromal cell-derived factor-1; dissociation of CXCR4 activation from binding and inhibition of HIV-1. *EMBO J* **16**, 6996-7007 (1997).



46. Robbiani, D.F. *et al.* Convergent antibody responses to SARS-CoV-2 in convalescent individuals. *Nature* **584**, 437-442 (2020).  
945
47. Gaebler, C. *et al.* Evolution of antibody immunity to SARS-CoV-2. *Nature* **591**, 639-644 (2021).
48. Gallais, F. *et al.* Evolution of antibody responses up to 13 months after SARS-CoV-2 infection and risk of reinfection. *EBioMedicine* **71**, 103561 (2021).  
950
49. Gonzalez-Quintela, A. *et al.* Serum levels of immunoglobulins (IgG, IgA, IgM) in a general adult population and their relationship with alcohol consumption, smoking and common metabolic abnormalities. *Clin Exp Immunol* **151**, 42-50 (2008).  
955
50. Su, Y. *et al.* Multiple early factors anticipate post-acute COVID-19 sequelae. *Cell* **185**, 881-895 e820 (2022).
51. Browne, S.K. & Holland, S.M. Anticytokine autoantibodies in infectious diseases: pathogenesis and mechanisms. *Lancet Infect Dis* **10**, 875-885 (2010).  
960
52. Garcia, D. & Erkan, D. Diagnosis and Management of the Antiphospholipid Syndrome. *N Engl J Med* **378**, 2010-2021 (2018).
- 965 53. Zeberg, H. The major genetic risk factor for severe COVID-19 is associated with protection against HIV. *Proc Natl Acad Sci U S A* **119** (2022).
54. Kousathanas, A. *et al.* Whole genome sequencing reveals host factors underlying critical Covid-19. *Nature* (2022).  
970
55. Howe, H.S. & Leung, B.P.L. Anti-Cytokine Autoantibodies in Systemic Lupus Erythematosus. *Cells* **9** (2019).
- 975 56. Victora, G.D. & Nussenzweig, M.C. Germinal centers. *Annu Rev Immunol* **30**, 429-457 (2012).
57. Gallo, R.C., Garzino-Demo, A. & DeVico, A.L. HIV infection and pathogenesis: what about chemokines? *J Clin Immunol* **19**, 293-299 (1999).
- 980 58. Godessart, N. & Kunkel, S.L. Chemokines in autoimmune disease. *Curr Opin Immunol* **13**, 670-675 (2001).
59. Thompson, D., Watt, J.A. & Brissette, C.A. Host transcriptome response to *Borrelia burgdorferi* sensu lato. *Ticks Tick Borne Dis* **12**, 101638 (2021).  
985
60. Berger, E.A., Murphy, P.M. & Farber, J.M. Chemokine receptors as HIV-1 coreceptors: roles in viral entry, tropism, and disease. *Annu Rev Immunol* **17**, 657-700 (1999).
- 990 61. Mouquet, H. & Nussenzweig, M.C. Polyreactive antibodies in adaptive immune responses to viruses. *Cell Mol Life Sci* **69**, 1435-1445 (2012).

62. Ercolini, A.M. & Miller, S.D. The role of infections in autoimmune disease. *Clin Exp Immunol* **155**, 1-15 (2009).  
995
63. Suurmond, J. & Diamond, B. Autoantibodies in systemic autoimmune diseases: specificity and pathogenicity. *J Clin Invest* **125**, 2194-2202 (2015).
64. Jorda, A. *et al.* Convalescent Plasma Treatment in Patients with Covid-19: A Systematic Review and Meta-Analysis. *Front Immunol* **13**, 817829 (2022).  
1000
65. Kufareva, I., Salanga, C.L. & Handel, T.M. Chemokine and chemokine receptor structure and interactions: implications for therapeutic strategies. *Immunol Cell Biol* **93**, 372-383 (2015).  
1005
66. Baden, L.R. *et al.* Efficacy and Safety of the mRNA-1273 SARS-CoV-2 Vaccine. *N Engl J Med* **384**, 403-416 (2021).
67. Polack, F.P. *et al.* Safety and Efficacy of the BNT162b2 mRNA Covid-19 Vaccine. *N Engl J Med* **383**, 2603-2615 (2020).  
1010
68. Cecchinato, V. *et al.* Impairment of CCR6+ and CXCR3+ Th Cell Migration in HIV-1 Infection Is Rescued by Modulating Actin Polymerization. *J Immunol* **198**, 184-195 (2017).  
1015
69. Stravalaci, M. *et al.* Recognition and inhibition of SARS-CoV-2 by humoral innate immunity pattern recognition molecules. *Nat Immunol* **23**, 275-286 (2022).
70. Bello-Rivero, I. *et al.* Characterization of the immunoreactivity of anti-interferon alpha antibodies in myasthenia gravis patients. Epitope mapping. *J Autoimmun* **23**, 63-73 (2004).  
1020
71. Shrock, E. *et al.* Viral epitope profiling of COVID-19 patients reveals cross-reactivity and correlates of severity. *Science* **370** (2020).  
1025
72. Clark-Lewis, I., Vo, L., Owen, P. & Anderson, J. Chemical synthesis, purification, and folding of C-X-C and C-C chemokines. *Methods Enzymol* **287**, 233-250 (1997).
73. Moepps, B. & Thelen, M. Monitoring Scavenging Activity of Chemokine Receptors. *Methods Enzymol* **570**, 87-118 (2016).  
1030
74. De Gasparo, R. *et al.* Bispecific IgG neutralizes SARS-CoV-2 variants and prevents escape in mice. *Nature* **593**, 424-428 (2021).
75. Ogilvie, P., Bardi, G., Clark-Lewis, I., Baggiolini, M. & Uguccioni, M. Eotaxin is a natural antagonist for CCR2 and an agonist for CCR5. *Blood* **97**, 1920-1924 (2001).  
1035
76. Zaslaver, A., Feniger-Barish, R. & Ben-Baruch, A. Actin filaments are involved in the regulation of trafficking of two closely related chemokine receptors, CXCR1 and CXCR2. *J Immunol* **166**, 1272-1284 (2001).  
1040

77. Loetscher, M. *et al.* TYMSTR, a putative chemokine receptor selectively expressed in activated T cells, exhibits HIV-1 coreceptor function. *Curr Biol* **7**, 652-660 (1997).
- 1045 78. Uguccioni, M., D'Apuzzo, M., Loetscher, M., Dewald, B. & Baggiolini, M. Actions of the chemotactic cytokines MCP-1, MCP-2, MCP-3, RANTES, MIP-1 alpha and MIP-1 beta on human monocytes. *Eur J Immunol* **25**, 64-68 (1995).
79. Robbiani, D.F. *et al.* Recurrent Potent Human Neutralizing Antibodies to Zika Virus in Brazil and Mexico. *Cell* **169**, 597-609 e511 (2017).
- 1050
80. Tiller, T. *et al.* Efficient generation of monoclonal antibodies from single human B cells by single cell RT-PCR and expression vector cloning. *J Immunol Methods* **329**, 112-124 (2008).
- 1055
81. von Boehmer, L. *et al.* Sequencing and cloning of antigen-specific antibodies from mouse memory B cells. *Nat Protoc* **11**, 1908-1923 (2016).
82. Ye, J., Ma, N., Madden, T.L. & Ostell, J.M. IgBLAST: an immunoglobulin variable domain sequence analysis tool. *Nucleic Acids Res* **41**, W34-40 (2013).
- 1060
83. Gupta, N.T. *et al.* Change-O: a toolkit for analyzing large-scale B cell immunoglobulin repertoire sequencing data. *Bioinformatics* **31**, 3356-3358 (2015).
- 1065
84. Schmidt, F. *et al.* Measuring SARS-CoV-2 neutralizing antibody activity using pseudotyped and chimeric viruses. *J Exp Med* **217** (2020).
85. Zheng, Y. *et al.* Structure of CC chemokine receptor 2 with orthosteric and allosteric antagonists. *Nature* **540**, 458-461 (2016).
- 1070
86. Shaik, M.M. *et al.* Structural basis of coreceptor recognition by HIV-1 envelope spike. *Nature* **565**, 318-323 (2019).
87. Wasilko, D.J. *et al.* Structural basis for chemokine receptor CCR6 activation by the endogenous protein ligand CCL20. *Nat Commun* **11**, 3031 (2020).
- 1075
88. Waterhouse, A. *et al.* SWISS-MODEL: homology modelling of protein structures and complexes. *Nucleic Acids Res* **46**, W296-W303 (2018).
- 1080
89. Blaszczyk, J. *et al.* Complete crystal structure of monocyte chemotactic protein-2, a CC chemokine that interacts with multiple receptors. *Biochemistry* **39**, 14075-14081 (2000).

1085

**Figure 1**

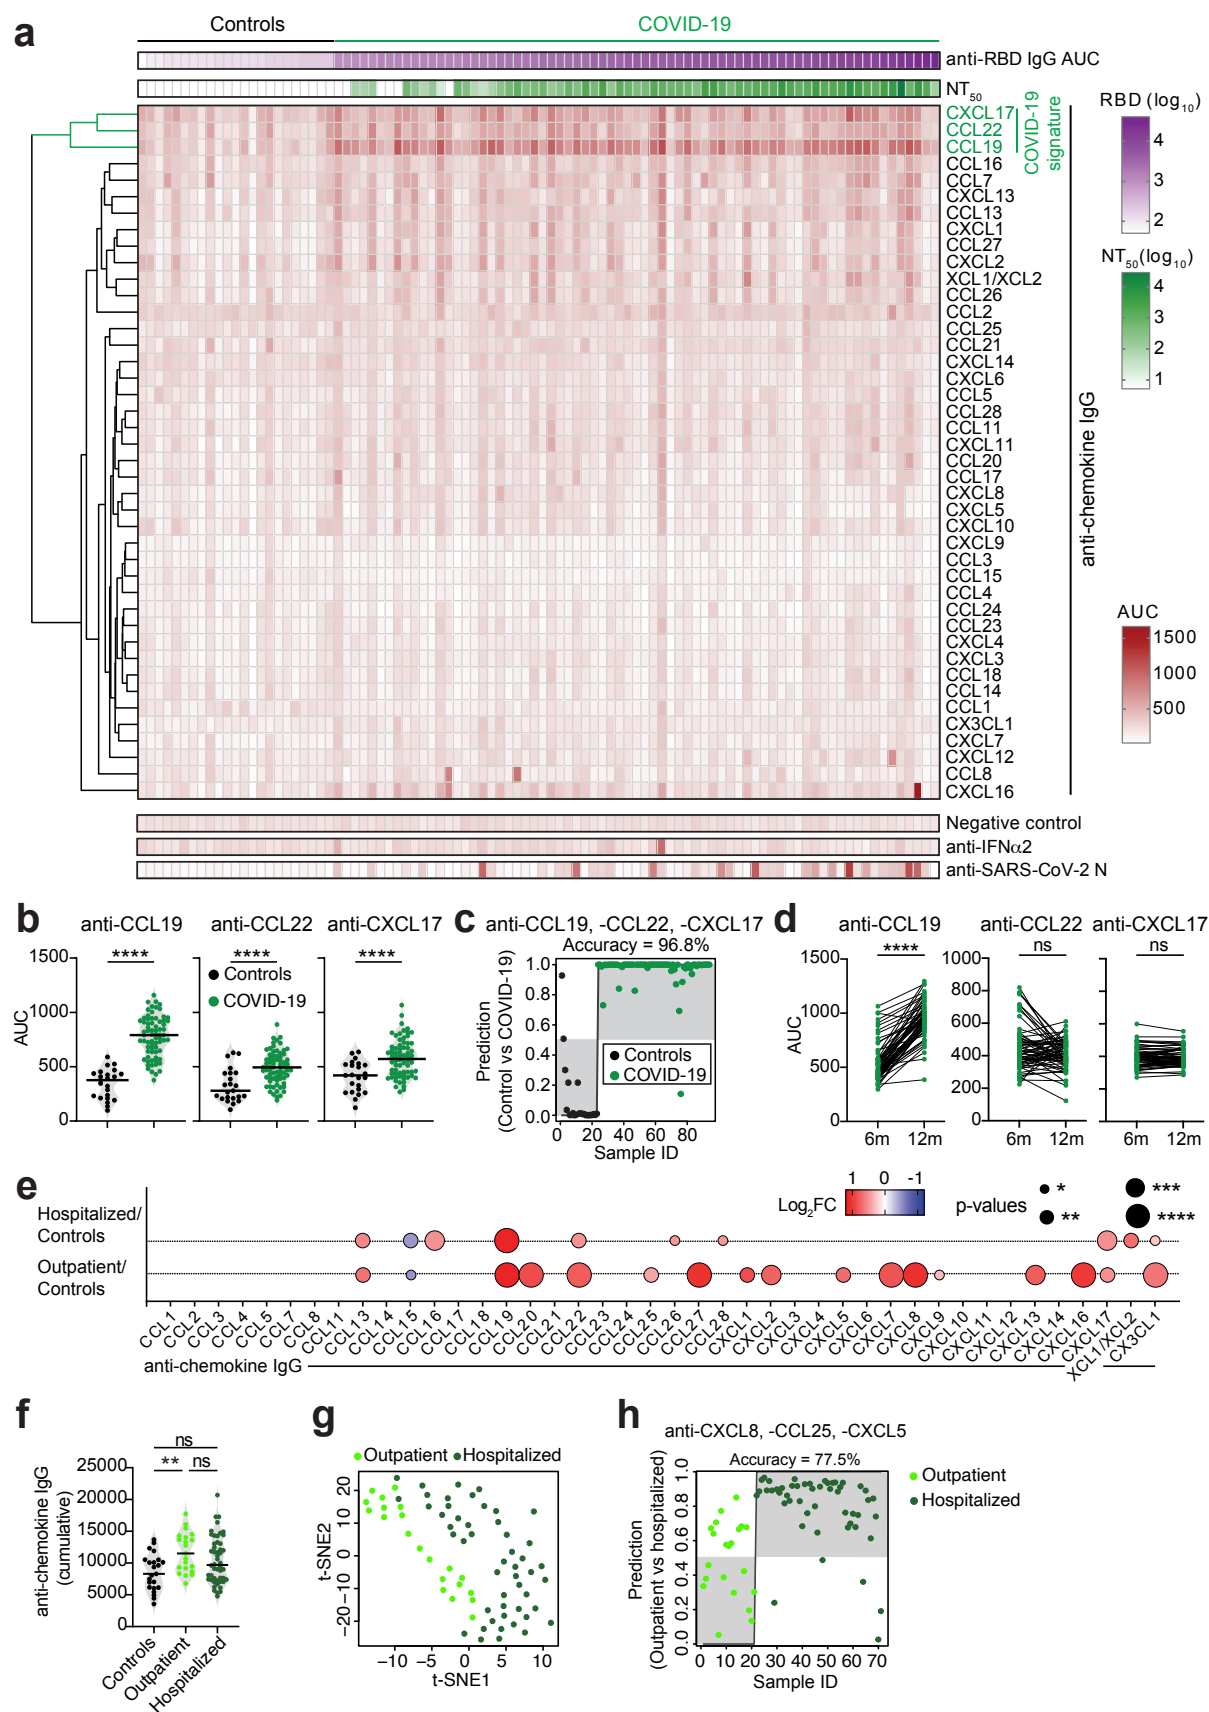

**Fig. 1. Distinct patterns of anti-chemokine antibodies in COVID-19 convalescents with different severity of acute disease.** (a) Anti-chemokine antibodies 6 months after COVID-19. Heatmap representing plasma IgG binding to 42 peptides comprising the N-loop sequence of all 43 human chemokines, as determined by ELISA (Area Under the Curve [AUC], average of two independent experiments). Samples are ranked according to the level of anti-SARS-CoV-2-RBD reactivity. Anti-chemokine IgGs are ordered by unsupervised clustering analysis of ELISA signal. SARS-CoV-2 pseudovirus neutralizing activity (NT<sub>50</sub>) and IgG binding to peptides corresponding to negative control, IFN $\alpha$ 2 and SARS-CoV-2 nucleocapsid protein (N) are shown. COVID-19 convalescents (n=71); controls (n=23). (b) Difference in IgG antibodies to CCL19, CCL22 and CXCL17 (COVID-19 signature). Horizontal bars indicate median values. Two-tailed Mann–Whitney U-tests. (c) Assignment of COVID-19 convalescents and controls based on the COVID-19 signature antibodies by logistic regression analysis. Dots on grey background are correctly assigned. (d) Anti-COVID-19 signature chemokine IgG antibodies at 6 and 12 months in convalescents. AUC from two independent experiments. Wilcoxon signed-rank test. (e) Difference in anti-chemokine antibodies between COVID-19 groups and controls. Summary circle plot: circle size indicates significance; colors show the Log<sub>2</sub> fold-change increase (red) or decrease (blue) over controls. Kruskal-Wallis test followed by Dunn’s multiple comparison test. (f) Difference in total anti-chemokine antibodies. Cumulative signal of the IgGs against the 42 peptides comprising the N-loop sequence of all 43 human chemokines. Horizontal bars indicate median values. Kruskal-Wallis test followed by Dunn’s multiple comparison test. (g) t-SNE distribution of COVID-19 outpatient and hospitalized individuals, as determined with the 42 datasets combined. (h) Assignment of COVID-19 outpatient and hospitalized individuals based on the COVID-19 hospitalization signature antibodies by logistic regression analysis. Dots on grey background are correctly assigned.

See also Extended Data Figs. 1-6.

**Figure 2**

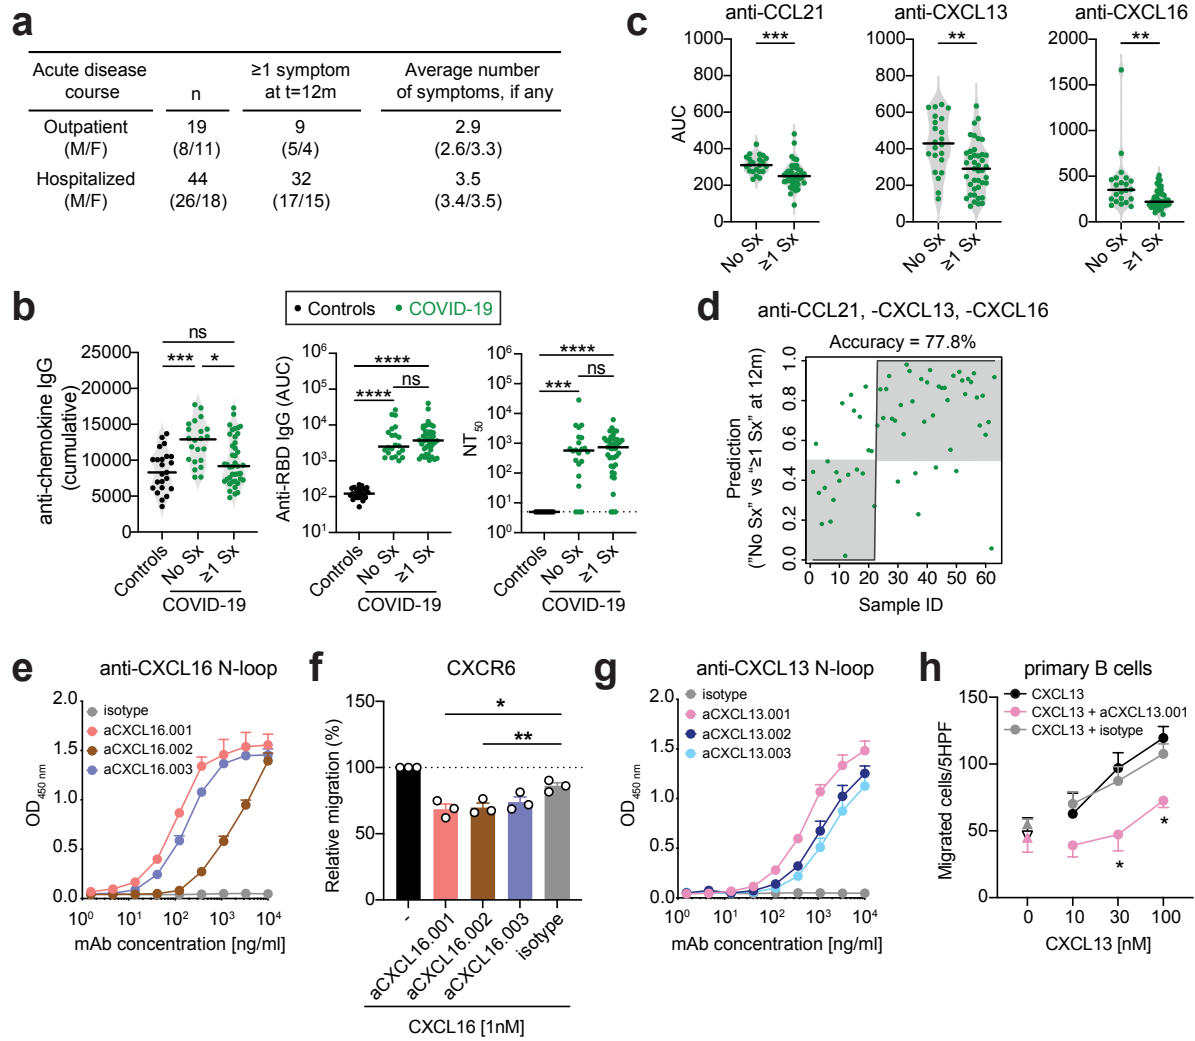

**Fig. 2. Anti-chemokine antibodies and long COVID.** (a) Characteristics of the COVID-19 convalescent Lugano cohort at 12 months. (b) Persisting symptoms (Sx) at 12 months and anti-chemokine IgG (cumulative; left), anti-RBD IgG (middle), and NT<sub>50</sub> (right) values at 6 months. Horizontal bars indicate median values. Average AUC from two independent experiments. Kruskal-Wallis test followed by Dunn's multiple comparison test. (c) Difference in antibodies to CCL21, CXCL13 and CXCL16 (Long COVID signature). Horizontal bars indicate median values. Average AUC from two independent experiments. Two-tailed Mann–Whitney U-tests. (d) Group assignment based on the Long COVID signature antibodies at 6 months against CCL21, CXCL13 and CXCL16, by logistic regression analysis. Dots on grey background are correctly assigned. (e) Anti-CXCL16 antibodies binding to the CXCL16 N-loop in ELISA. Average of two independent experiments (Mean+SEM). (f) Inhibition of chemotaxis by anti-CXCL16 N-loop antibodies. Relative cell migration towards CXCL16 by cells uniquely expressing CXCR6 (see Methods). Mean+SEM of 3 independent experiments. Paired, two-tailed Student's t test. (g) Anti-CXCL13 antibodies binding to the CXCL13 N-loop in ELISA. Average of two independent experiments (Mean+SEM). (h) The anti-CXCL13 N-loop antibody aCXCL13.001 inhibits CXCL13 chemotaxis of primary CD19<sup>+</sup> human B cells. Mean±SEM of migrated cells in 5 high-power fields (HPF). Average of 3 independent experiments with cells from different donors. Up-pointing triangles indicate antibody alone, and down-pointing triangle is buffer control. Two-way RM ANOVA followed by Šídák's multiple comparisons test.

See also Extended Data Figs. 7 and 8.

**Figure 3**

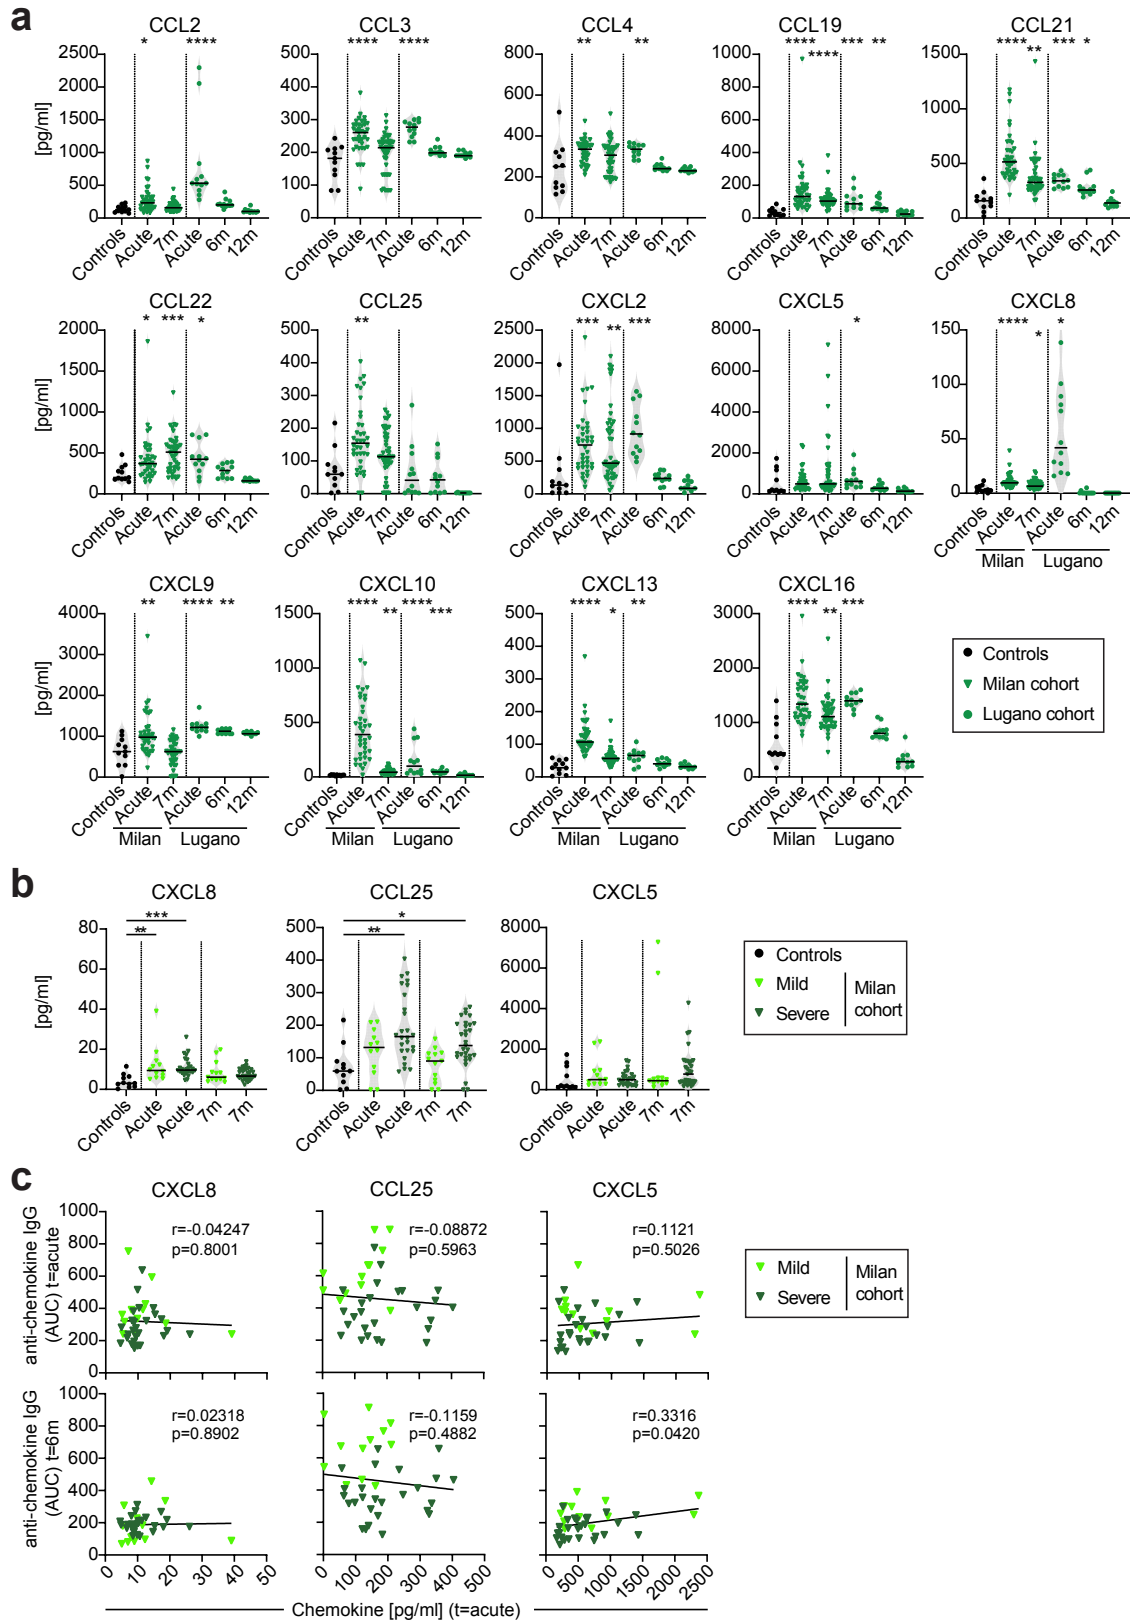



**Fig. 3. Chemokines in plasma during or after COVID-19.** (a) Plasma chemokine levels in the Milan (n=44) and Lugano (n=12) cohorts at the indicated time points after disease onset. Horizontal bars indicate median values. Kruskal-Wallis test followed by Dunn's multiple comparison test over controls. (b) Levels of COVID-19 hospitalization signature chemokines (CXCL5, CXCL8 and CCL25) in mild versus severe patients (Milan cohort). Horizontal bars indicate median values. Kruskal-Wallis test followed by Dunn's multiple comparison test. (c) Correlation between chemokine and autoantibody levels determined by Pearson correlation analysis.

## Figure 4

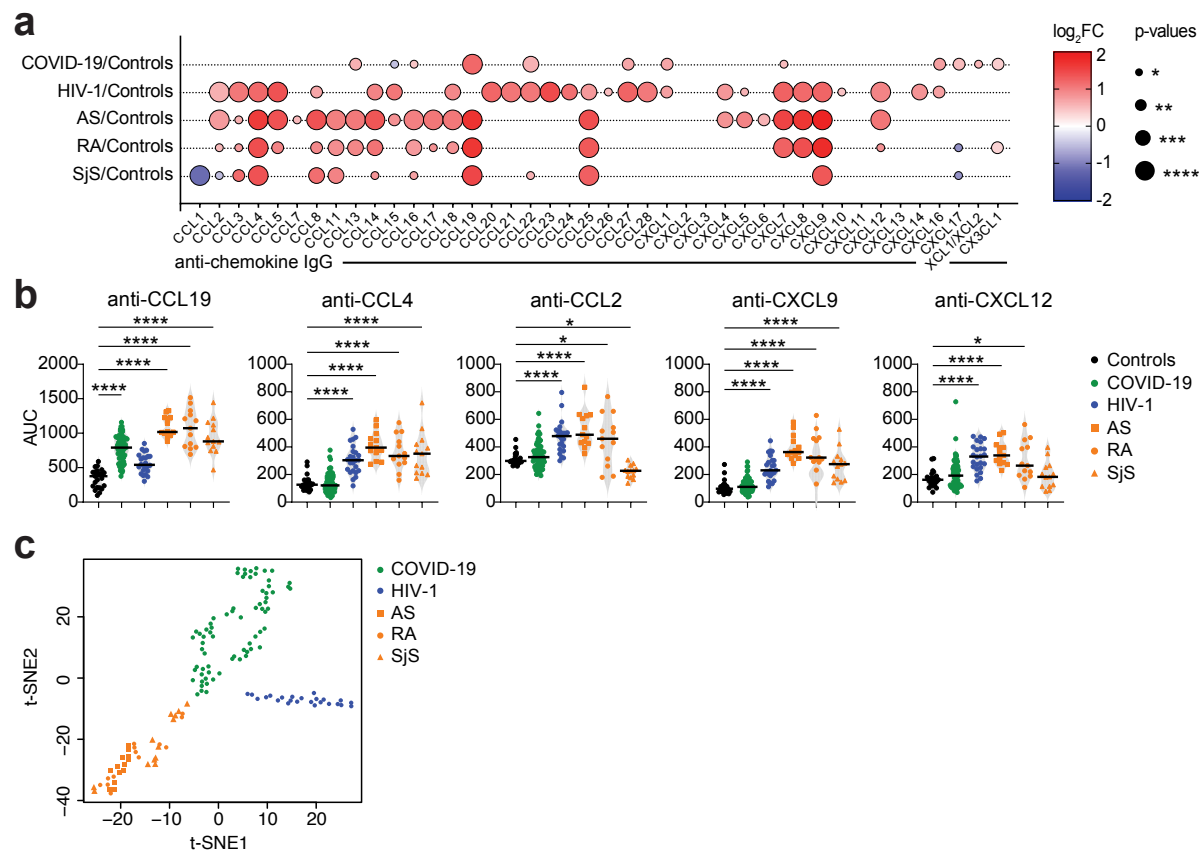

**Fig. 4. Distinct patterns of anti-chemokine antibodies in COVID-19, HIV-1 or autoimmune diseases.** (a) Difference in anti-chemokine antibodies between diseases and controls. Summary circle plot: circle size indicates significance; colors show the Log<sub>2</sub> fold-change increase (red) or decrease (blue) over controls. Kruskal-Wallis test followed by Dunn's multiple comparison test. (b) Difference in antibodies to CCL19, CCL4, CCL2, CXCL9 and CXCL12 across groups. Controls (n=23), COVID-19 (n=71), HIV-1 (n=24), Ankylosing Spondylitis (AS, n=13), Rheumatoid Arthritis (RA, n=13), and Sjögren's syndrome (SjS, n=13). Horizontal bars indicate median values. Average AUC from two independent experiments. Kruskal-Wallis test followed by Dunn's multiple comparison test over rank of the control group. (c) t-SNE distribution of disease samples, as determined with the 42 datasets combined.

See also Extended Data Figs. 9 and 10.

# Extended Data Figures

## Extended Data Fig. 1

**a**

| Gender | n  | Average age in years (range) | Hospitalized/ outpatient | % with symptoms at 12 months (Yes/No) |
|--------|----|------------------------------|--------------------------|---------------------------------------|
| Male   | 38 | 60 (33-81)                   | 30/8                     | 65% (22/12)                           |
| Female | 33 | 58 (18-78)                   | 20/13                    | 66% (19/10)                           |

**b**

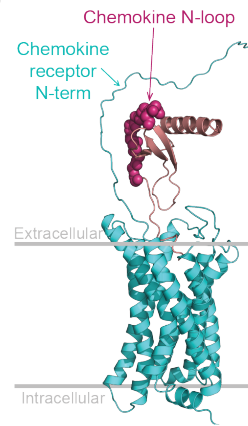

**c**

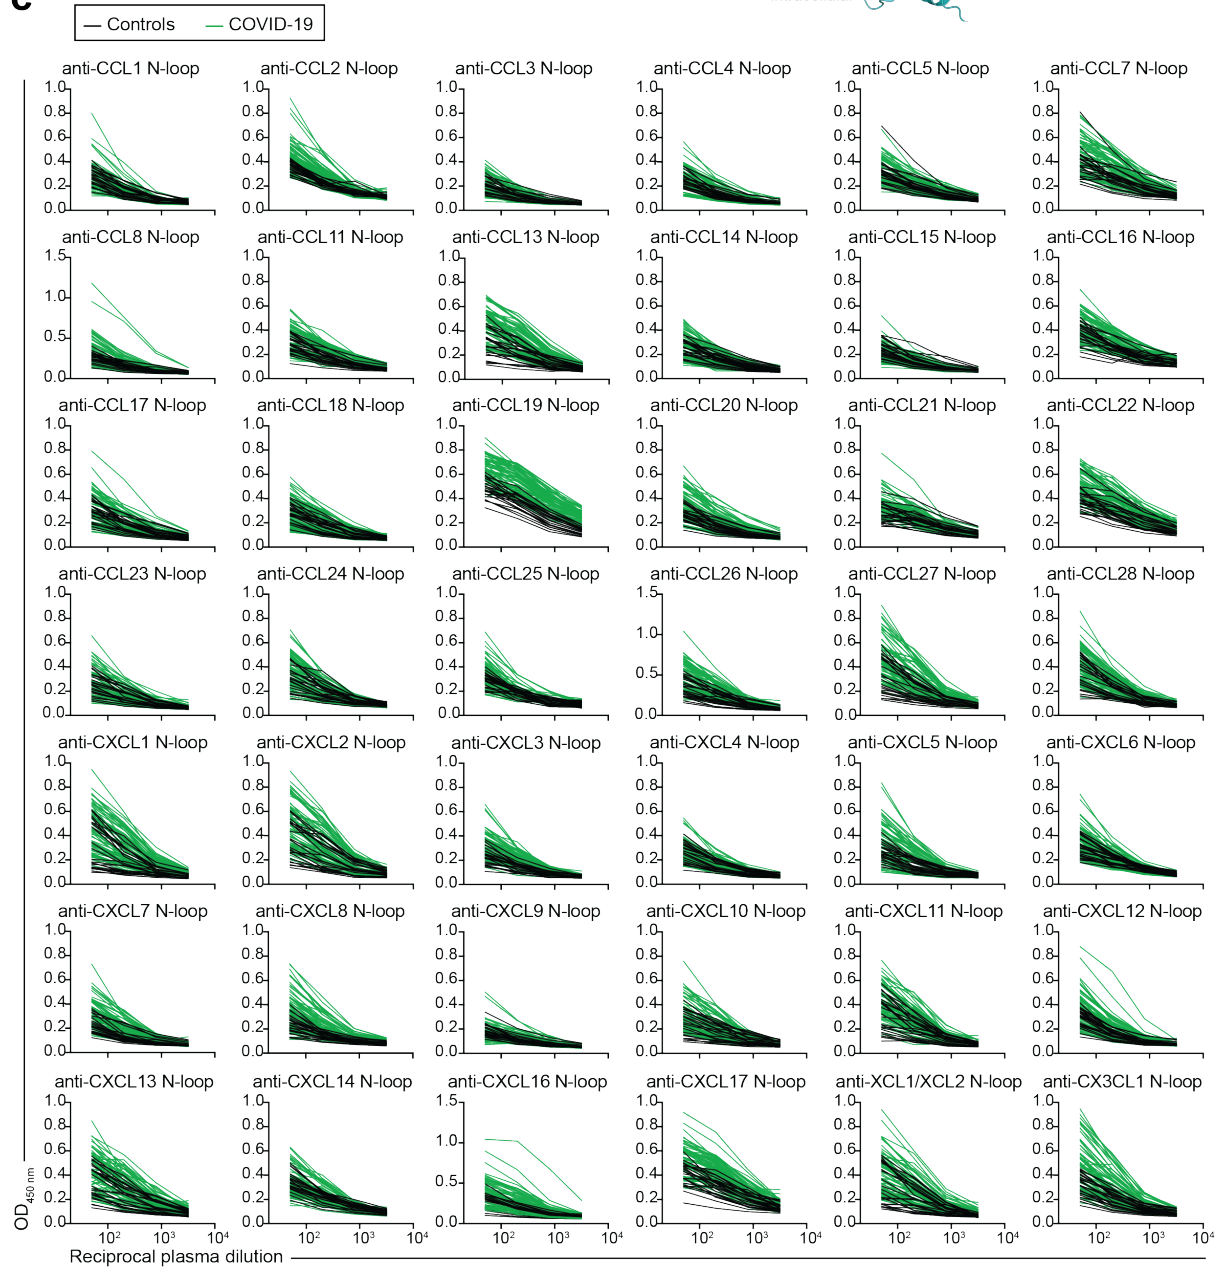

**Extended Data Fig. 1. Anti-chemokine N-loop antibodies in COVID-19, related to Fig. 1.**

(a) Characteristics of the Lugano COVID-19 cohort. (b) Model of the interaction between a chemokine and its receptor. Arrows point to the area of putative interaction between the N-terminus of the receptor and the chemokine N-loop (shown by spheres). Chemokine is magenta and chemokine receptor is cyan. (c) The amount of plasma IgG antibodies against each chemokine N-loop was determined by ELISA for COVID-19 convalescents (n=71) and controls (n=23). Average optical density (OD<sub>450</sub>) measurements of two independent experiments.

## Extended Data Fig. 2

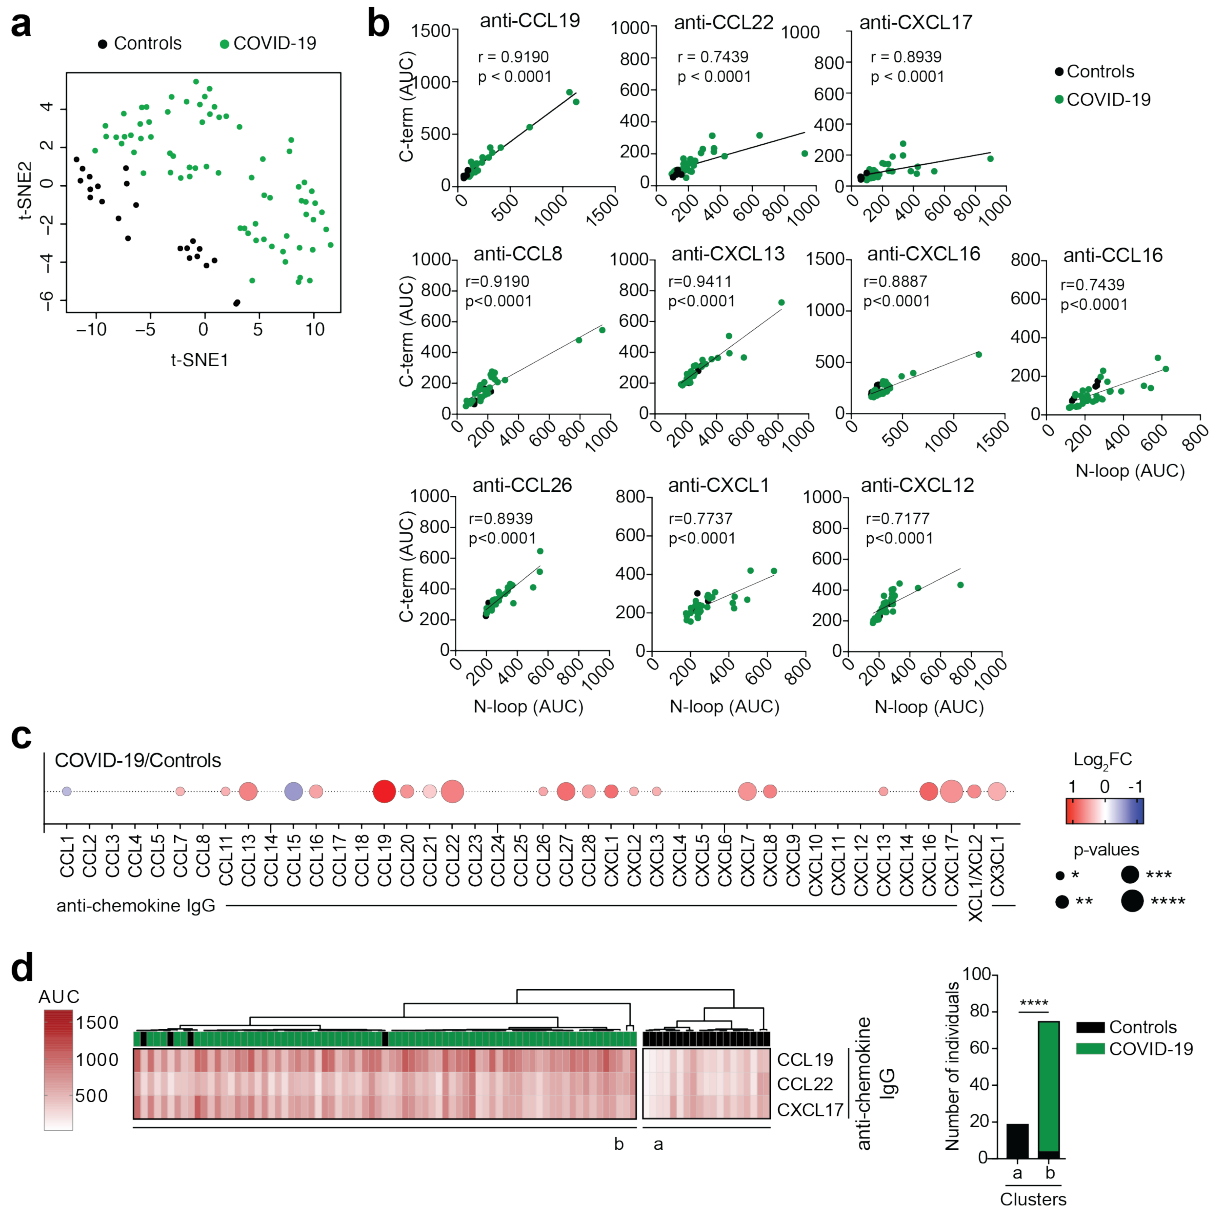

**Extended Data Fig. 2. Analyses of anti-chemokine antibodies, related to Fig. 1.** (a) t-SNE distribution of COVID-19 convalescents and controls, as determined with the 42 datasets combined. (b) Pearson correlations of antibodies to the N-loop and C-terminal peptides of the same chemokine. ELISA was performed in a cohort subset (Controls, n=5; COVID-19, n=31). Average of two independent experiments. (c) Differences in anti-chemokine antibodies between groups. Summary circle plot: circle size indicates significance; colors show the Log<sub>2</sub> fold-change increase (red) or decrease (blue) in the COVID-19 group over control. Two-tailed Mann–Whitney U-tests. (d) Antibodies to CCL19, CCL22 and CXCL17 classify COVID-19 convalescents versus controls. Unsupervised hierarchical clustering analysis with the COVID-19 signature antibodies. The distribution of the groups within each cluster is also shown. Fisher’s exact test.

## Extended Data Fig. 3

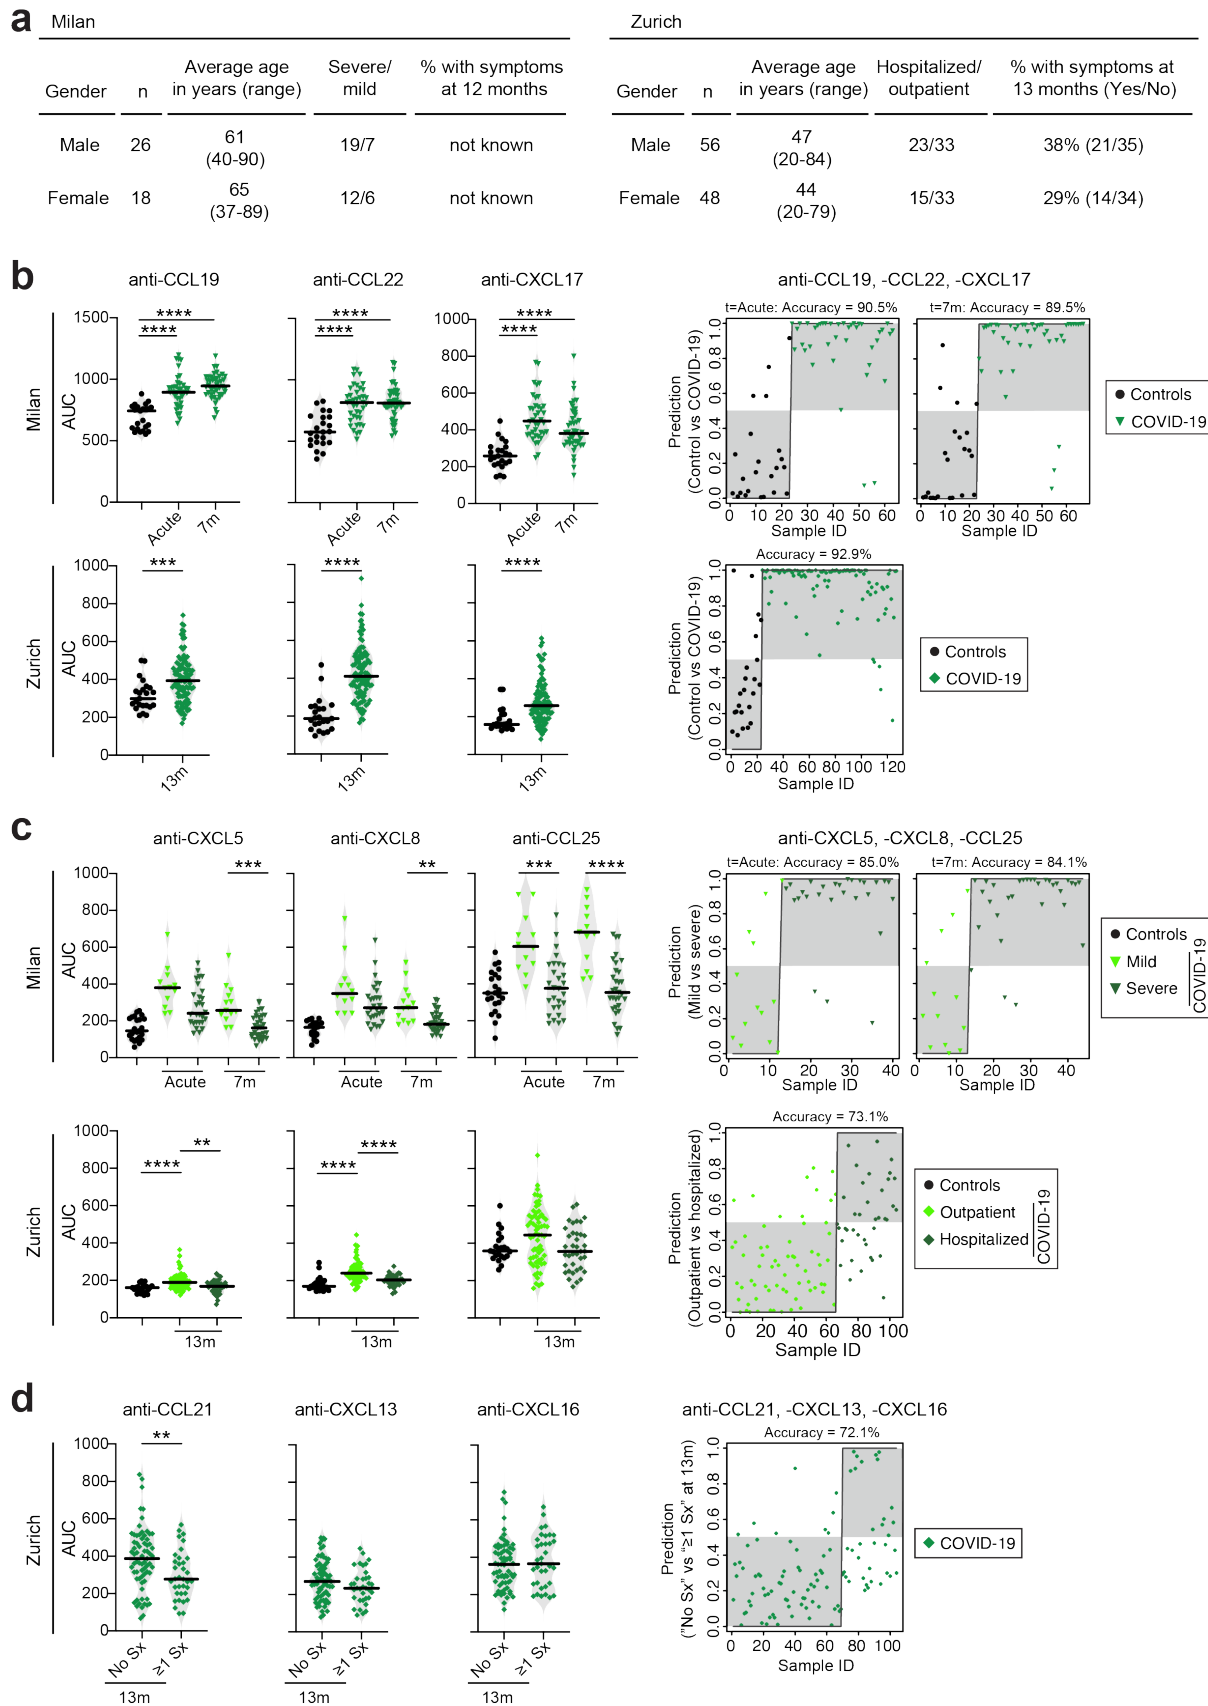

**Extended Data Fig. 3. Analyses of anti-chemokine antibodies in the validation cohorts of Milan and Zurich, related to Figs. 1-3.** (a) Characteristics of the COVID-19 cohorts. (b) Left, difference in autoantibodies to CCL19, CCL22 and CXCL17 (COVID-19 signature). Kruskal-Wallis test followed by Dunn's multiple comparison test (Milan) and two-tailed Mann-Whitney U-tests (Zurich). Right, assignment of COVID-19 convalescents and controls based on the COVID-19 signature antibodies by logistic regression analysis. (c) Left, difference in autoantibodies to CXCL5, CXCL8 and CCL25 (COVID-19 hospitalization signature). Kruskal-Wallis test followed by Dunn's multiple comparison test. Right, assignment of COVID-19 mild/outpatient and severe/hospitalized individuals based on the COVID-19 hospitalization signature antibodies by logistic regression analysis. (d) Left, difference in autoantibodies to CCL21, CXCL13 and CXCL16 (Long COVID signature). Two-tailed Mann-Whitney U-tests. Right, group assignment based on the Long COVID signature antibodies by logistic regression analysis in the Zurich cohort. In (b-d), horizontal bars indicate median values; dots on grey background are correctly assigned; data are shown as average AUC of two independent experiments.



## Extended Data Fig. 4

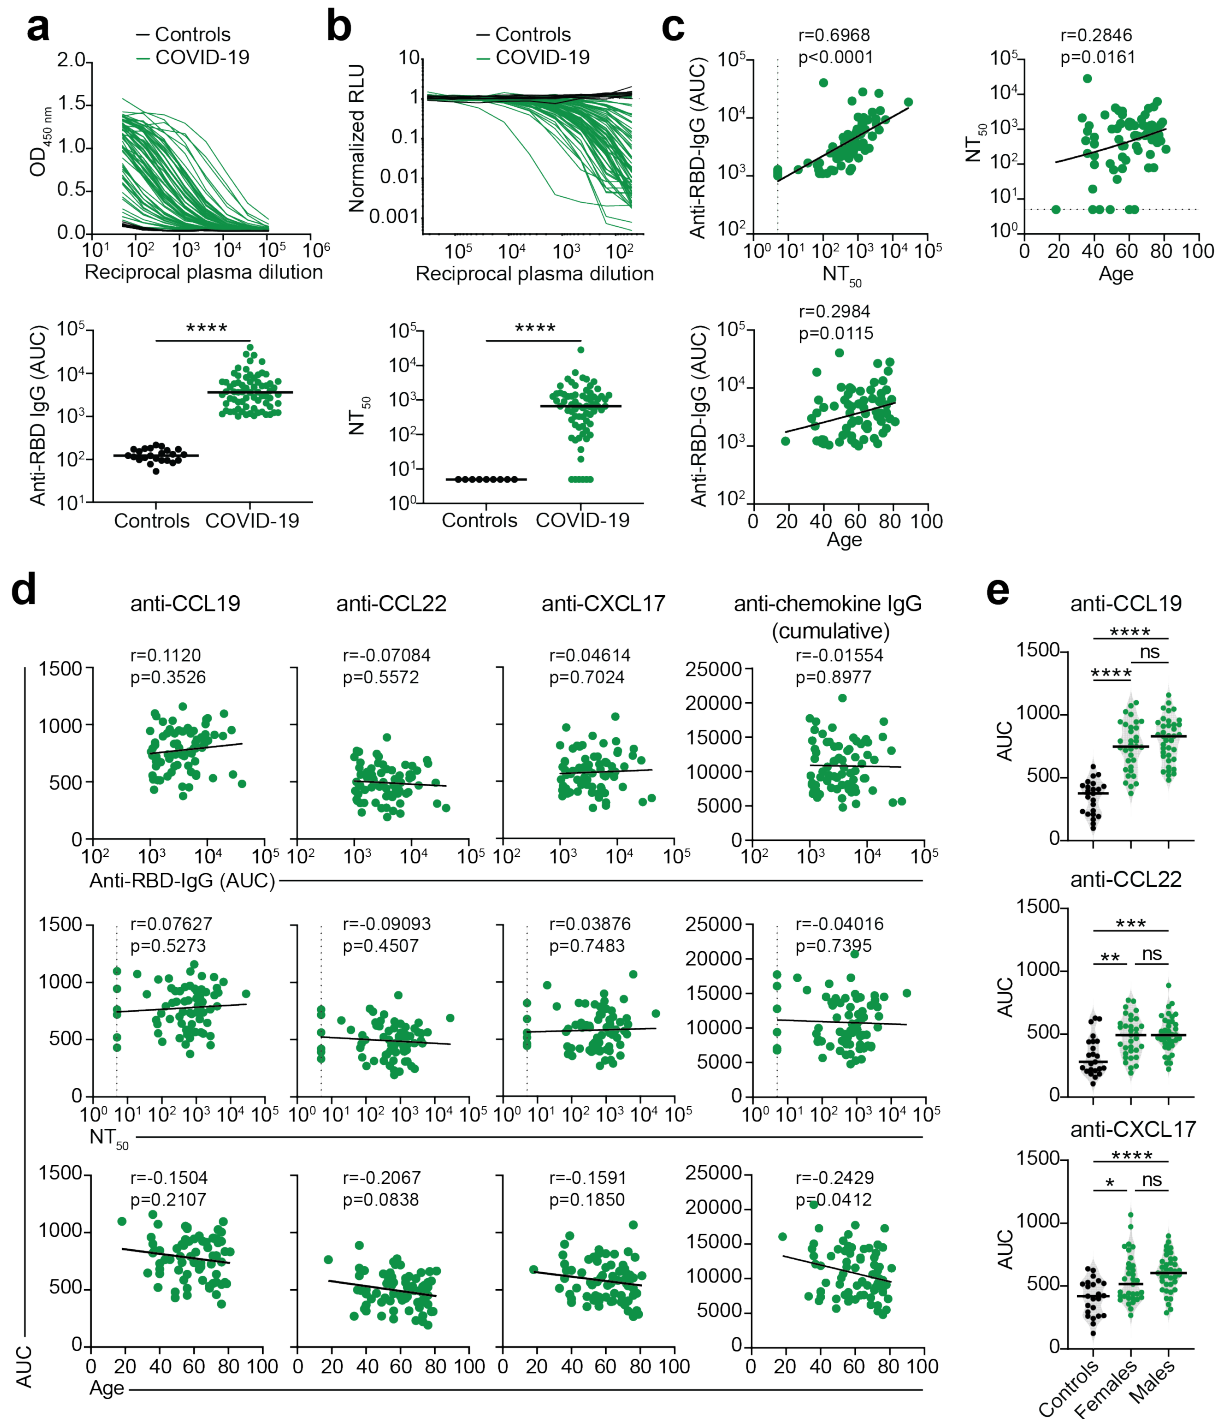

**Extended Data Fig. 4. Correlation analyses of COVID-19 signature anti-chemokine antibodies, related to Fig. 1.** (a) Anti-RBD IgG antibodies in the cohort samples. Top, optical density reactivity ( $OD_{450}$ ) of serial plasma dilutions to the receptor binding domain (RBD) of SARS-CoV-2 Spike, as determined by ELISA. Bottom, AUC of the data in the top panel. COVID-19 convalescents (n=71); controls (n=23). Average of two independent experiments. Horizontal bars indicate median values. Two-tailed Mann–Whitney U-tests. (b) Plasma neutralizing activity against SARS-CoV-2 pseudovirus. Top, relative luciferase units (RLU) normalized to no plasma control. Bottom, half-maximal neutralizing titers ( $NT_{50}$ ) based on the data in the top panel. COVID-19 convalescents (n=71); controls (n=9). Average of two independent experiments. Horizontal bars indicate median values. Two-tailed Mann–Whitney U-tests. (c) Pearson correlations of anti-RBD IgG and  $NT_{50}$  values to each other and with age. Average of two independent experiments. (d) Pearson correlations of anti-chemokine IgG with anti-RBD IgG,  $NT_{50}$  values and age. COVID-19 signature antibodies individually, and cumulative signal of the IgGs against the peptides for all 43 chemokines. (e) Analysis of anti-signature chemokines IgG by gender. Data are shown as average AUC of two independent experiments. Horizontal bars indicate median values. Kruskal-Wallis test followed by Dunn’s multiple comparison test.

## Extended Data Fig. 5

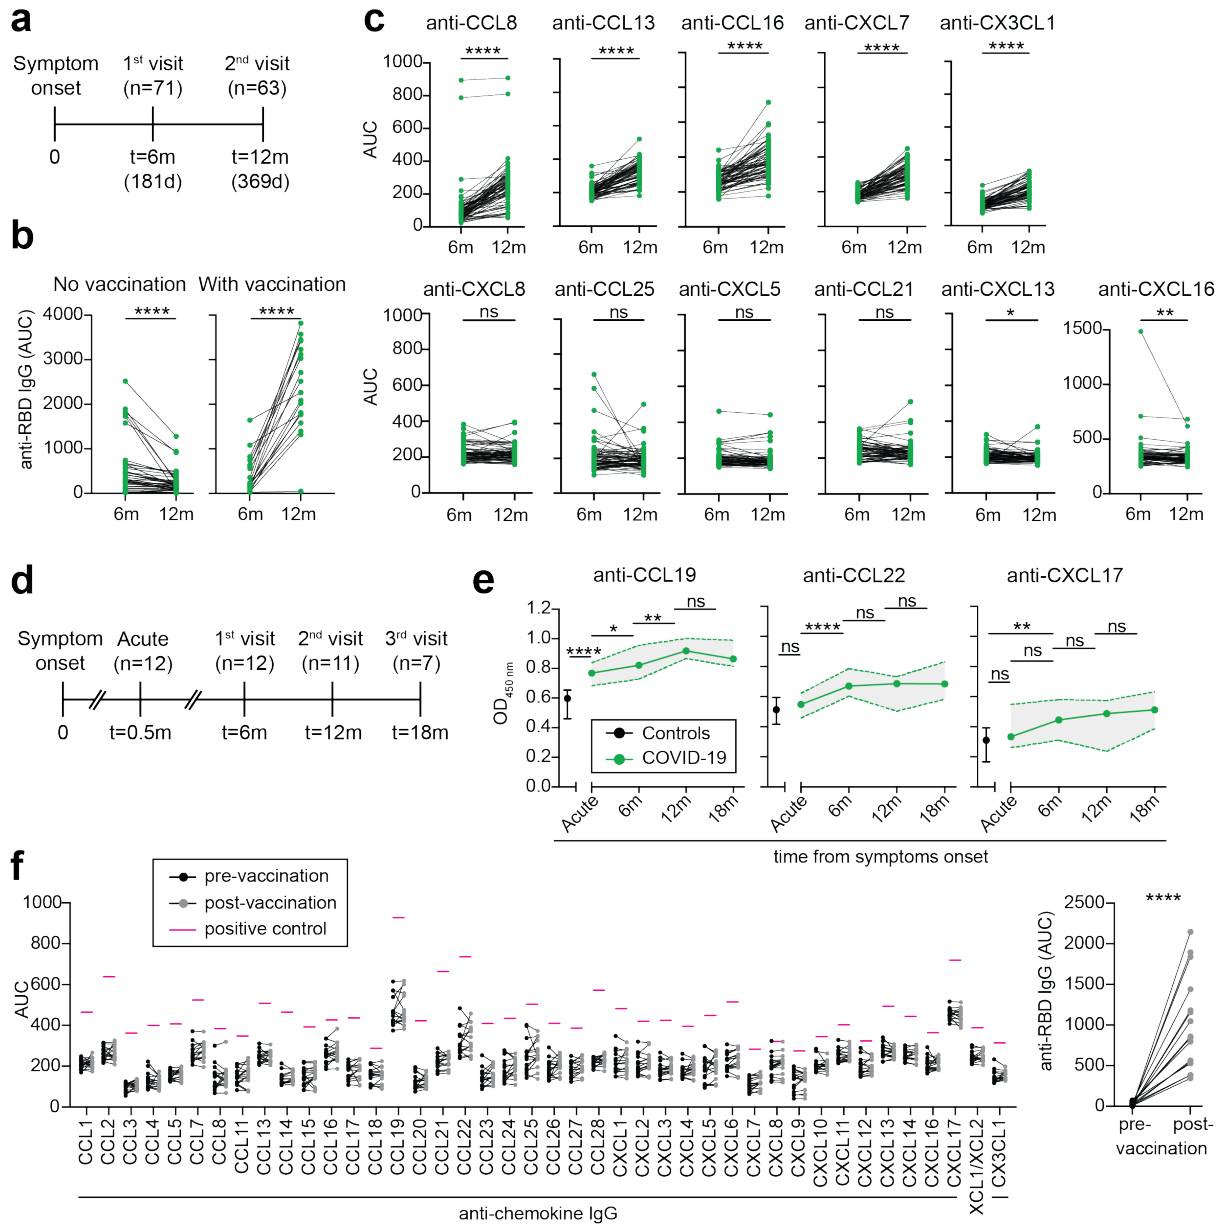

**Extended Data Fig. 5. Anti-chemokine antibodies over time and upon COVID-19 vaccination, related to Fig. 1.** (a) Diagram of the time points of blood collection after onset of COVID-19 symptoms. (b) Anti-RBD IgG antibodies at 6 and 12 months in vaccinated and non-vaccinated convalescents, as determined by ELISA. Average AUC from two independent experiments. Wilcoxon signed-rank test. (c) Anti-chemokine IgG antibodies at 6 and 12 months in convalescents. AUC from two independent experiments. Wilcoxon signed-rank test. (d) Diagram of the time points of blood collection after onset of COVID-19 symptoms in a subset of COVID-19 hospitalized individuals. (e) Anti-chemokine IgG antibodies at 15 days (Acute), 6, 12 and 18 months after onset of COVID-19 symptoms. Average optical density (OD<sub>450</sub>) values from two independent experiments. One-way ANOVA test followed by Tukey's multiple comparison test. Data are shown as median±range. (f) Anti-chemokine IgG antibodies before and approximately 4 months after COVID-19 mRNA vaccination of uninfected individuals (n=16). AUC from two independent experiments. Pink lines represent the signal of a positive control plasma sample with broad reactivity (CLM70). Anti-RBD IgG is shown alongside as control (right panel). Wilcoxon signed-rank test with false discovery rate (FDR) approach.

## Extended Data Fig. 6

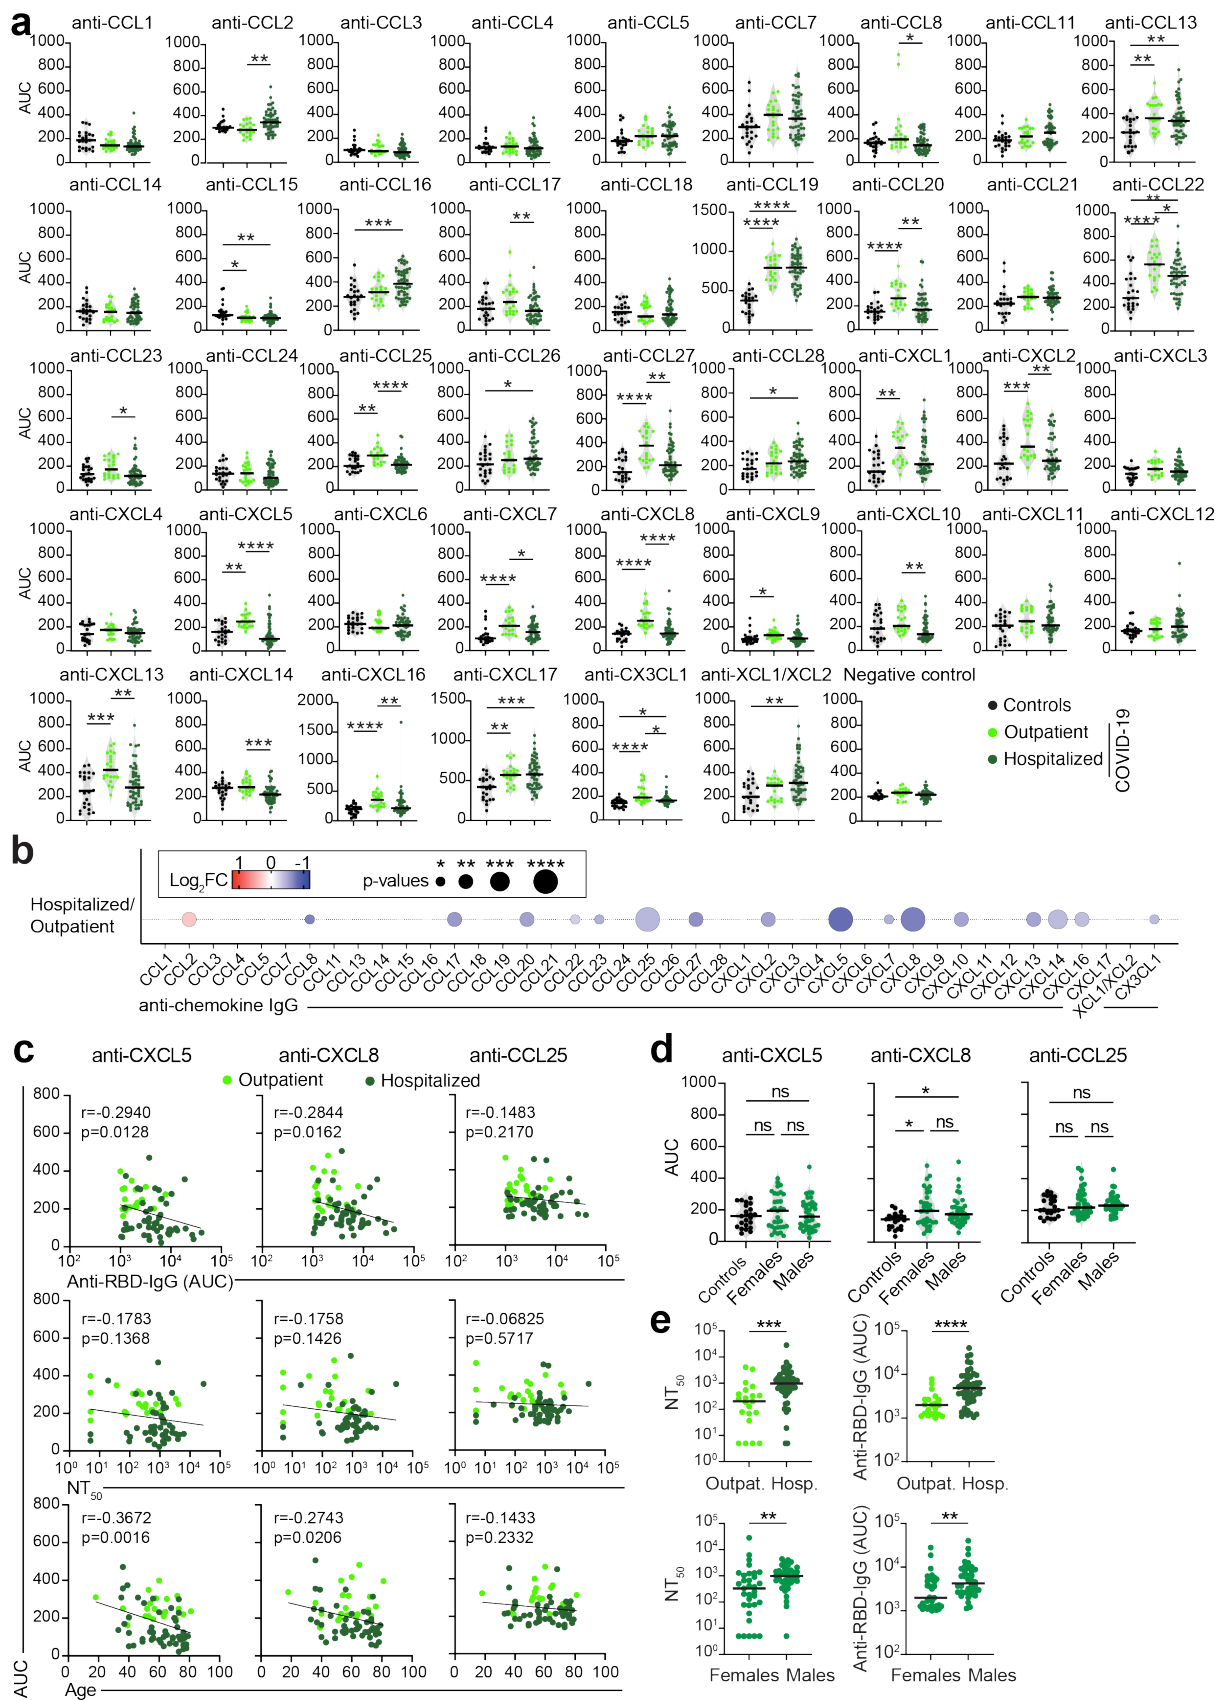

**Extended Data Fig. 6. Anti-chemokine antibodies in COVID-19 outpatient and hospitalized individuals and correlation analyses of COVID-19 hospitalization signature antibodies, related to Fig. 1.** (a) Difference in anti-chemokine antibodies in outpatient versus hospitalized individuals at 6 months. Average AUC of two independent experiments. Horizontal bars indicate median values. Kruskal-Wallis test followed by Dunn's multiple comparison test. (b) Difference in anti-chemokine antibodies between COVID-19 outpatient and hospitalized individuals. Summary circle plot: circle size indicates significance; colors show the Log<sub>2</sub> fold-change increase (red) or decrease (blue) over outpatients. Kruskal-Wallis test followed by Dunn's multiple comparison test. (c) Pearson correlations of anti-chemokine IgGs with anti-RBD IgG, NT<sub>50</sub> values and age. COVID-19 hospitalization signature antibodies individually. Average of two independent experiments. (d) Analysis of anti-signature chemokine IgGs by gender. Data are shown as average AUC of two independent experiments. Horizontal bars indicate median values. Kruskal-Wallis test followed by Dunn's multiple comparison test. (e) Analysis of anti-RBD IgG and NT<sub>50</sub> values by group and by gender. Average of two independent experiments. Horizontal bars indicate median values. Two-tailed Mann-Whitney U-tests.

## Extended Data Fig. 7

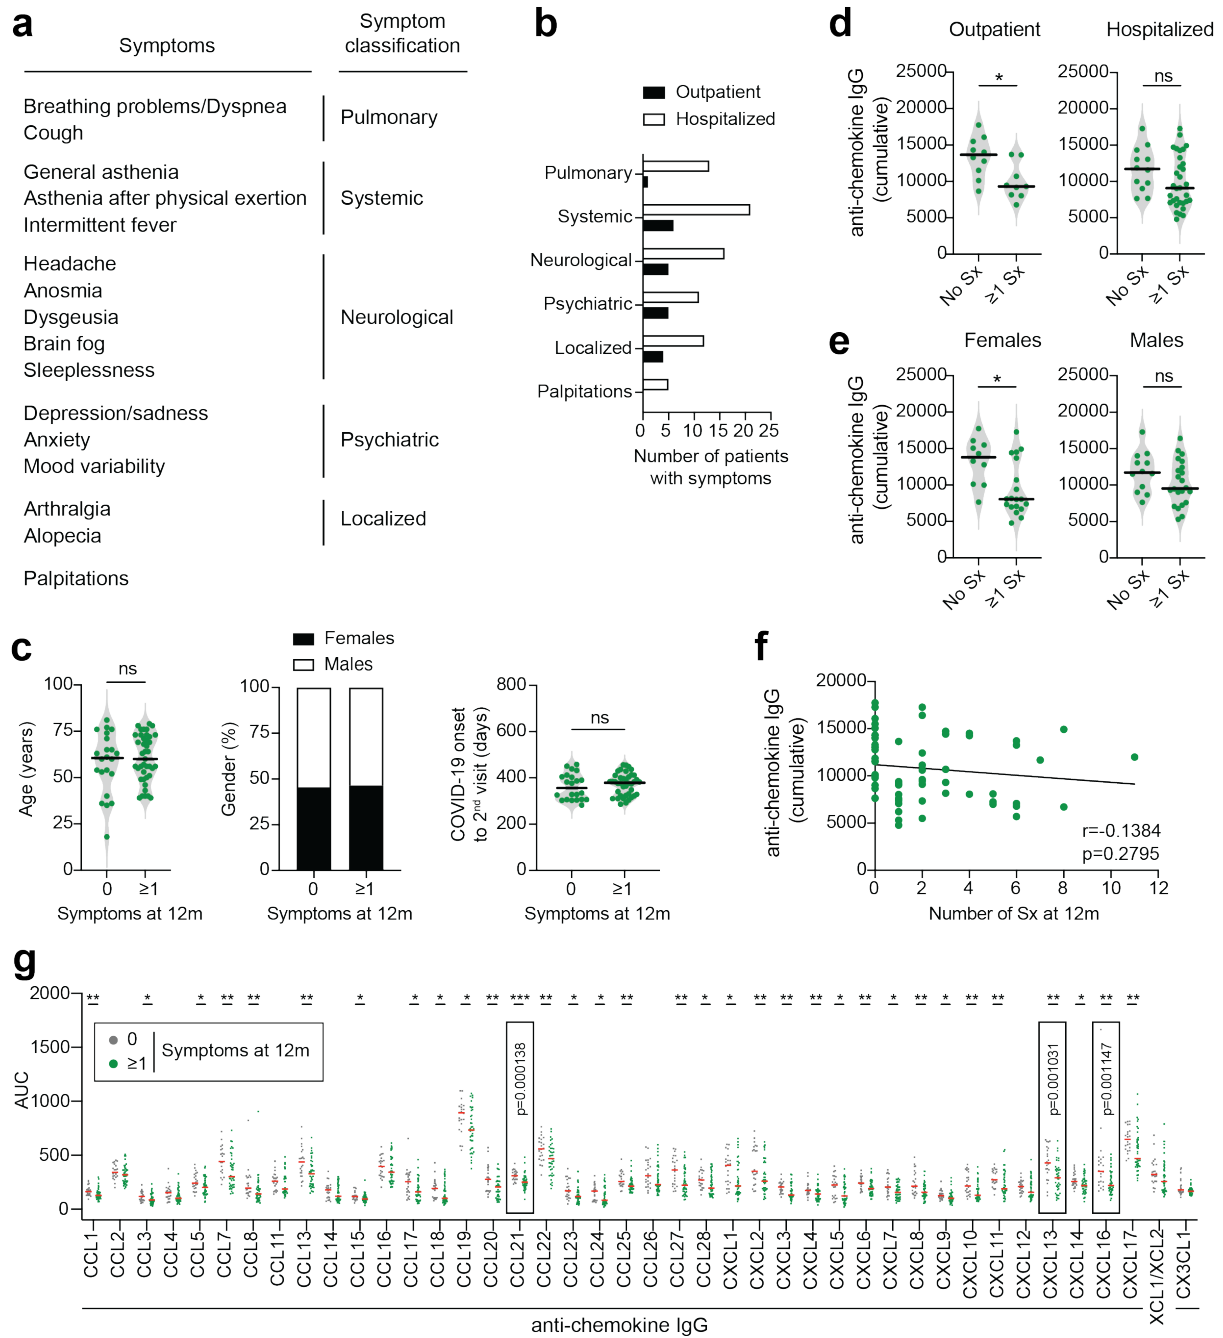

**Extended Data Fig. 7. Anti-chemokine antibodies and long-term COVID-19 symptoms, related to Fig. 2.** (a) Classification of long-term COVID-19 symptoms at 12 months (t=12m). (b) Incidence of symptoms at 12 months. Participants are grouped in outpatient and hospitalized individuals. (c) Analysis of age (left), gender distribution (middle) and time from COVID-19 onset to 2<sup>nd</sup> visit (t=12m; right). Horizontal bars indicate median values. Two-tailed Mann–Whitney U-tests. (d,e) Difference in cumulative anti-chemokine antibodies according to the presence or absence of symptoms at 12 months in disease severity groups (d) or by gender (e). Data are shown as average AUC of two independent experiments. Horizontal bars indicate median values. Two-tailed Mann–Whitney U-tests. (f) Pearson correlation of anti-chemokine antibodies and the number of symptoms at 12 months. Average of two independent experiments. (g) Difference in anti-chemokines antibodies at 6 months and the presence or absence of symptoms at 12 months. Data are shown as average AUC of two independent experiments. Horizontal bars indicate median values. Two-tailed Mann–Whitney U-tests. The exact P-value is given for the 3 chemokines displaying the highest significance.



## Extended Data Fig. 8

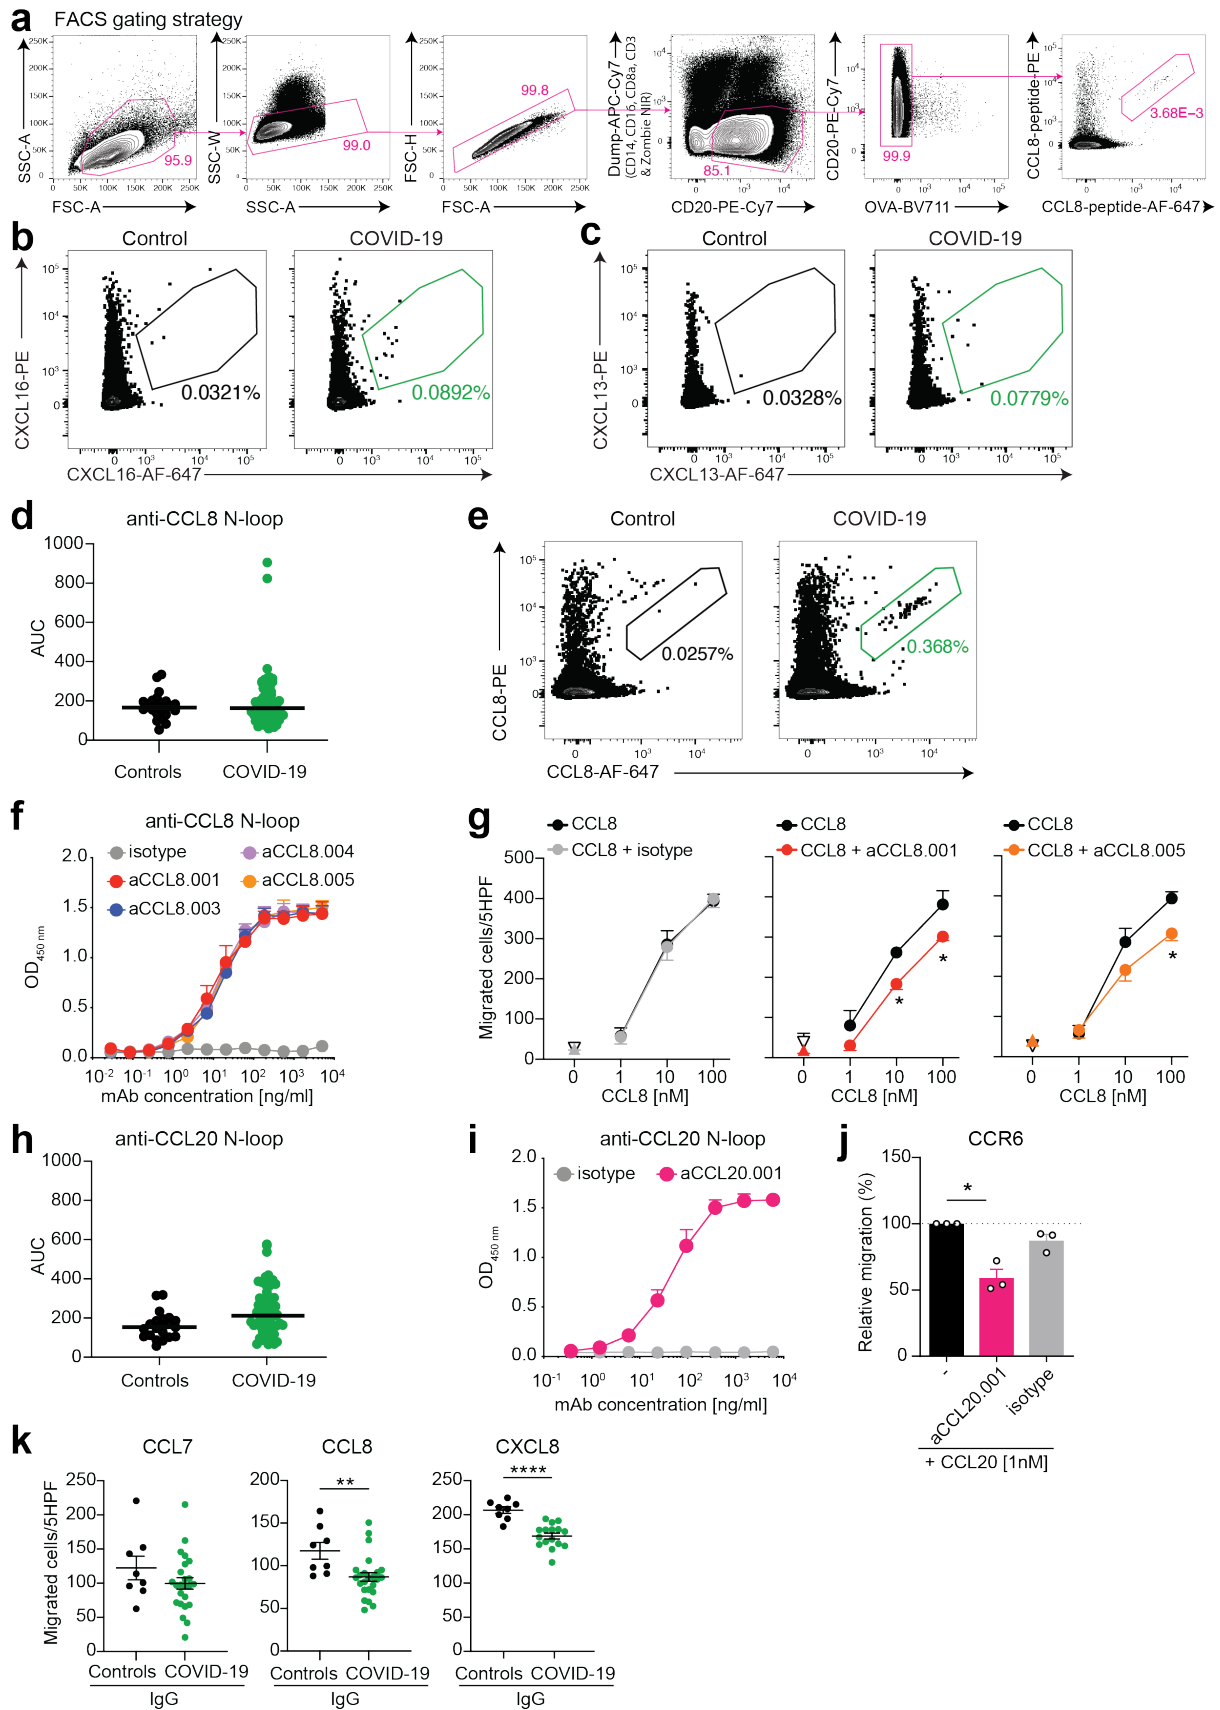

**Extended Data Fig. 8. Human monoclonal antibodies that impede chemotaxis, related to**

**Fig. 2. (a)** Gating strategy for sorting CCL8 N-loop specific B cells by flow cytometry. **(b)** Human B cells specific for CXCL16. Representative flow cytometry plots identifying human B cells binding to the CXCL16 N-loop peptide (gate). The frequency of antigen-specific B cells is shown. **(c)** Human B cells specific for CXCL13. Representative flow cytometry plots identifying human B cells binding to the CXCL13 N-loop peptide (gate). The frequency of antigen-specific B cells is shown. **(d)** Identification of individuals with high anti-CCL8 N-loop antibodies. Area under the curve (AUC), as determined by ELISA. Average of two independent experiments. COVID-19 convalescents (n=71); controls (n=23). Horizontal bars indicate median values. **(e)** CCL8 binding human B cells. Flow cytometry plots identify human B cells binding to the CCL8 N-loop peptide (gate). The frequency of antigen-specific B cells is shown. **(f)** Monoclonal antibodies to the CCL8 N-loop. ELISA binding curves of representative antibodies. Average of two independent experiments (Mean+SEM). **(g)** Chemotaxis of human monocytes towards CCL8 is inhibited by monoclonal antibodies. Mean±SEM of migrated cells in 5 high-power fields (HPF). At least 3 independent experiments with cells from different donors. Up-pointing triangle is antibody alone, and down-pointing triangle is buffer control. Two-way RM ANOVA followed by Šídák's multiple comparisons test. **(h)** Identification of individuals with high anti-CCL20 N-loop antibodies. Area under the curve (AUC), as determined by ELISA. Average of two independent experiments. COVID-19 convalescents (n=71); controls (n=23). Horizontal bars indicate median values. **(i)** Monoclonal antibodies to the CCL20 N-loop. ELISA binding curve of a representative antibody. Average of two independent experiments (Mean+SEM). **(j)** Anti-CCL20 N-loop antibodies inhibit CCL20 chemotaxis to CCR6. Relative cell migration towards CCL20. Mean+SEM of at least 3 independent experiments. Two-tailed Mann–Whitney U-tests. **(k)** Polyclonal IgGs from COVID-19 convalescents inhibit chemotaxis. Chemotaxis of preB 300.19 cells expressing either CCR2 or CXCR1 towards the indicated chemokines (CCL7 or CCL8 for CCR2; CXCL8 for CXCR1) was measured in the presence of plasma IgGs from COVID-19 convalescents (n=24 for CCL7 and CCL8; n=16 for CXCL8) or controls (n=8). Technical triplicates (Mean±SEM) of migrated cells in 5 high-power fields (HPF). Two-tailed Mann–Whitney U-tests.

## Extended Data Fig. 9

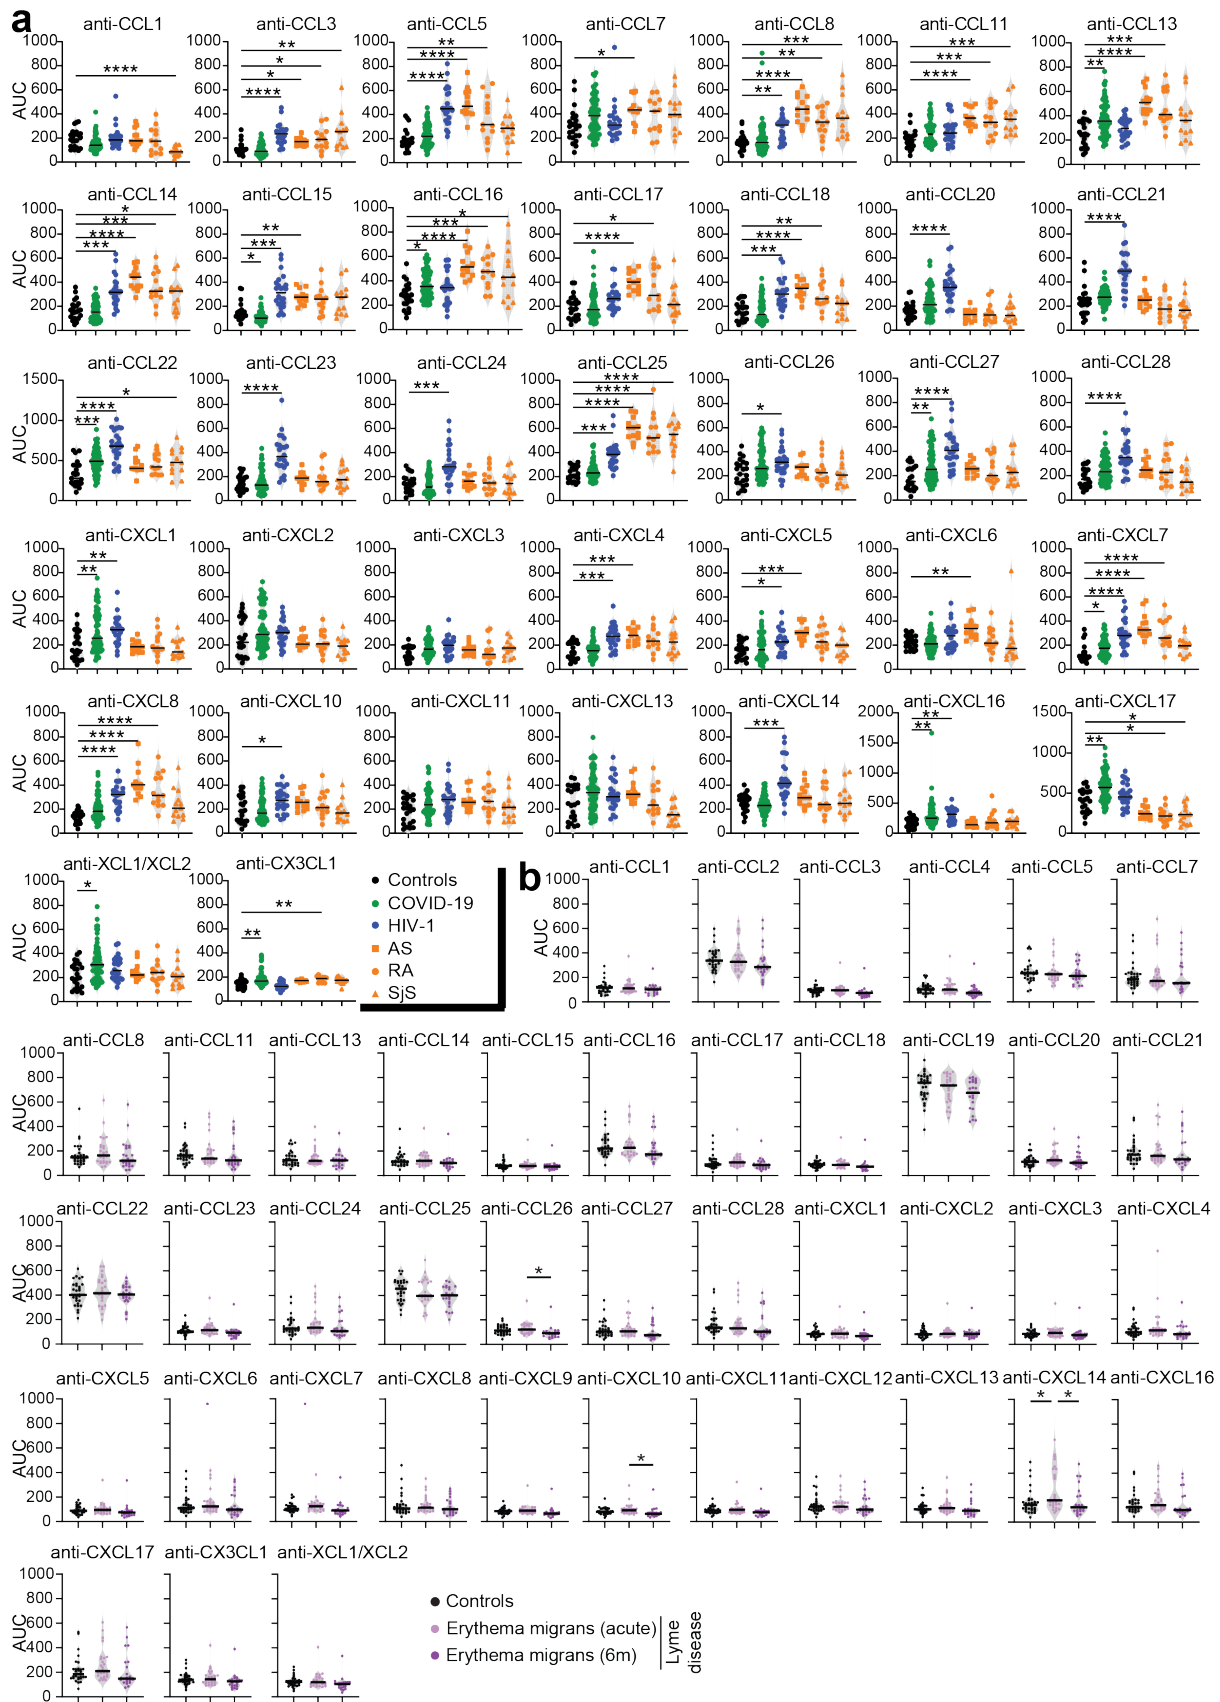

**Extended Data Fig. 9. Anti-chemokine N-loop antibodies in HIV-1, autoimmune and Lyme diseases, related to Fig. 4.** (a) The amount of plasma IgG antibodies against each chemokine N-loop was determined by ELISA for HIV-1 infected (n=24, blue) and autoimmune patients (n=39, orange). Autoimmune patients were subdivided in Ankylosing Spondylitis (AS, n=13), Rheumatoid Arthritis (RA, n=13), and Sjögren's syndrome (SjS, n=13). Values from controls (n=23, black), and COVID-19 convalescents (n=71, green) are shown alongside. Average AUC of two independent experiments. Horizontal bars indicate median values. Statistical significance was determined using Kruskal-Wallis test followed by Dunn's multiple comparison test over rank of the control group. (b) The amount of plasma IgG antibodies against each chemokine N-loop was determined by ELISA for *Borrelia*-infected patients (n=27, Lyme disease with erythema migrans) in the acute phase and at 6 months post infection, as measured by ELISA. Average AUC of two independent experiments. Horizontal bars indicate median values. Statistical significance was determined using Kruskal-Wallis test followed by Dunn's multiple comparison test.

## Extended Data Fig. 10

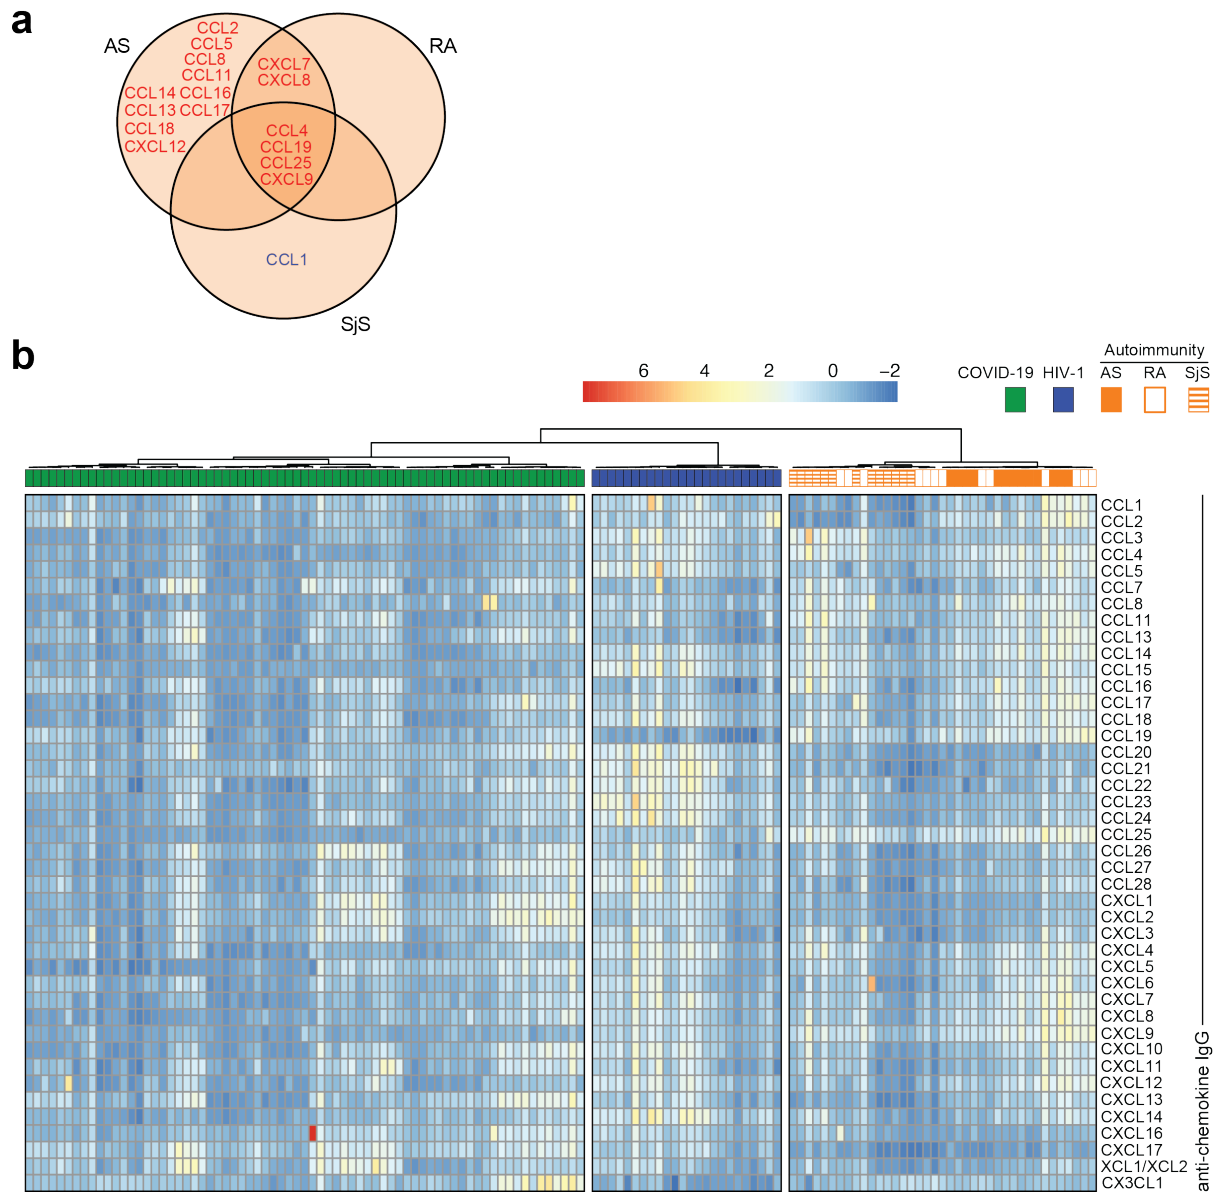

**Extended Data Fig. 10. Clustering of COVID-19, HIV-1 and autoimmune diseases based on anti-chemokine antibodies, related to Fig. 4.** (a) Venn diagram of the chemokines targeted by autoantibodies across the autoimmune disorders AS, RA and SJS. Red and blue colors indicate either an increase or decrease over controls with  $p < 10^{-4}$ . (b) Anti-chemokine antibodies correctly classify COVID-19 convalescents, HIV-1-infected, and patients with autoimmune disorders. Heatmap representing the normalized plasma IgG binding to 42 peptides comprising the N-loop sequence of all 43 human chemokines. Unsupervised hierarchical clustering analysis. The distribution of the groups within each cluster is shown.
